# Supplementary material for: Predicting ultrahigh risk multiple myeloma by molecular profiling: an analysis of newly diagnosed transplant eligible myeloma XI trial patients
Source: PubMed Central journal article supplement (PMC7584474; doi:10.1038/s41375-020-0750-z), 2020-03-11

## **SUPPLEMENTARY METHODS**

### **Patients**

We studied 329 NDMM patients enrolled in the intensive (transplant-eligible) treatment pathway of UK NCRI Myeloma XI (ISRCTN49407852), the first outcomes of which have been published recently.<sup>1</sup> Briefly, these patients were initially randomized to triplet induction based on thalidomide (CTD) or lenalidomide (CRD) in combination with cyclophosphamide and dexamethasone with treatment intensification with cyclophosphamide, bortezomib and dexamethasone (CVD) vs no intensification for insufficient responders (partial or minimal response) and intensification (CVD) for non-responders (stable or progressive disease). After high-dose melphalan (HDMEL) and autologous stem-cell transplantation (ASCT), patients were randomized to receive lenalidomide, lenalidomide plus vorinostat or observation. Maintenance treatment continued until progressive disease in the absence of toxicity (see Trial Flowcharts, below). The 329 patients were selected by the Clinical Trials Research Unit (CTRU) at the University of Leeds based on age, sex, induction treatment and maintenance treatment to reflect the overall trial population (Supplementary Table 1).

To validate study findings, we analyzed 116 transplant-eligible pathway patients from the MRC Myeloma IX trial (ISRCTN68454111) with chromosomal aberration and gene expression data (GSE15695). Myeloma IX trial outcomes have been previously reported.<sup>2</sup> Briefly, patients in this trial were randomized to receive induction with cyclophosphamide, vincristine, doxorubicin and dexamethasone (C-VAD) or CTD, followed by HDMEL and ASCT and a second randomization to thalidomide or observation (see Trial Flowcharts, below).

All patients provided written informed consent. The studies were approved by the national ethics review board (National Research Ethics Service, UK), institutional review boards of the participating centres, and the competent regulatory authority (Medicines and Healthcare Products Regulatory Agency, UK), and done according to the Declaration of Helsinki and the principles of Good Clinical Practice as espoused in the Medicines for Human Use (Clinical Trials) Regulations.

### **Translocation and copy number profiling**

Recurrent immunoglobulin locus translocations including t(4;14), t(14;16), t(14;20), t(11;14) and t(6;14) were assessed by qRT-PCR as previously described.<sup>3</sup> Copy number aberrations were profiled using MLPA Salsa-P425 mix (MRC Holland, The Netherlands) and analyzed using Coffalyser software (MRC Holland) following manufacturer's instructions. Deletions and gain/amplification was called as previously described, hyperdiploidy was defined by gain of at least 2 of consensus chromosomes 5, 9 or 15.<sup>3</sup>

### **Gene expression profiling**

GEP was performed on a diagnostic Affymetrix GeneChip 3000 Dx v2.0 system following the SKY92 MMProfiler (SkylineDx, The Netherlands) protocol. Anonymized GEP data was transferred, processed centrally by SkylineDx as per standard protocol and binary SKY92 risk status (High risk/Standard risk) reported back as part of a standard diagnostic report. For exploratory analyzes, data was normalized as described previously for the EMC92 score and batch corrected to HOVON gene expression arrays deposited at the NCBI-GEO repository ([GSE19784](https://www.ncbi.nlm.nih.gov/geo/query/acc.cgi?acc=GSE19784)).<sup>4</sup> Gene expression continuous scores for other risk signatures were calculated as previously described.<sup>4-9</sup>

## **Statistical analyses**

Statistical analyses were performed in R (version 3.5.1) using sub-routines survival, metaphor and base R functions. Progression-free survival (PFS) was defined as time from induction or maintenance randomization or time of transplant to progression or death and overall survival (OS) as time from induction or maintenance randomization or time of transplant to death. Cox proportional hazards regression was used to estimate univariate and multivariable hazard ratios (HRs) and 95% confidence intervals (CI). Kaplan–Meier survival curves were generated and homogeneity between groups was assessed using the log-rank test. Association between categorical variables was examined using Fishers exact test and between continuous variables using the Wilcoxon signed-rank test or t-test for normally distributed variables. Correlation between continuous variables was calculated using Pearson product-moment correlation. A two-sided P-value of  $\leq 0.05$  was considered statistically significant.

# TRIAL FLOWCHARTS

Trial outline NCRI Myeloma XI, intensive treatment pathway

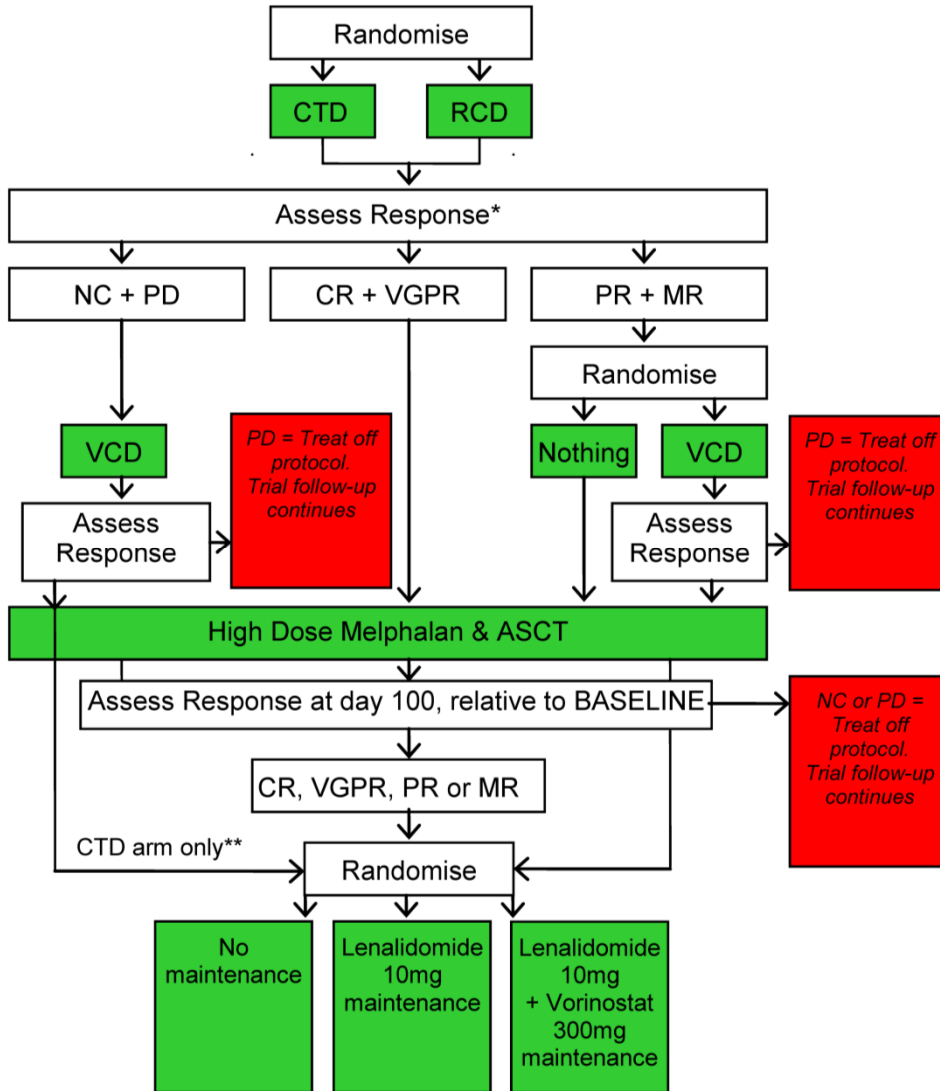

CONSORT diagram MRC Myeloma IX. Only patients from the intensive treatment pathway were included in the current analysis

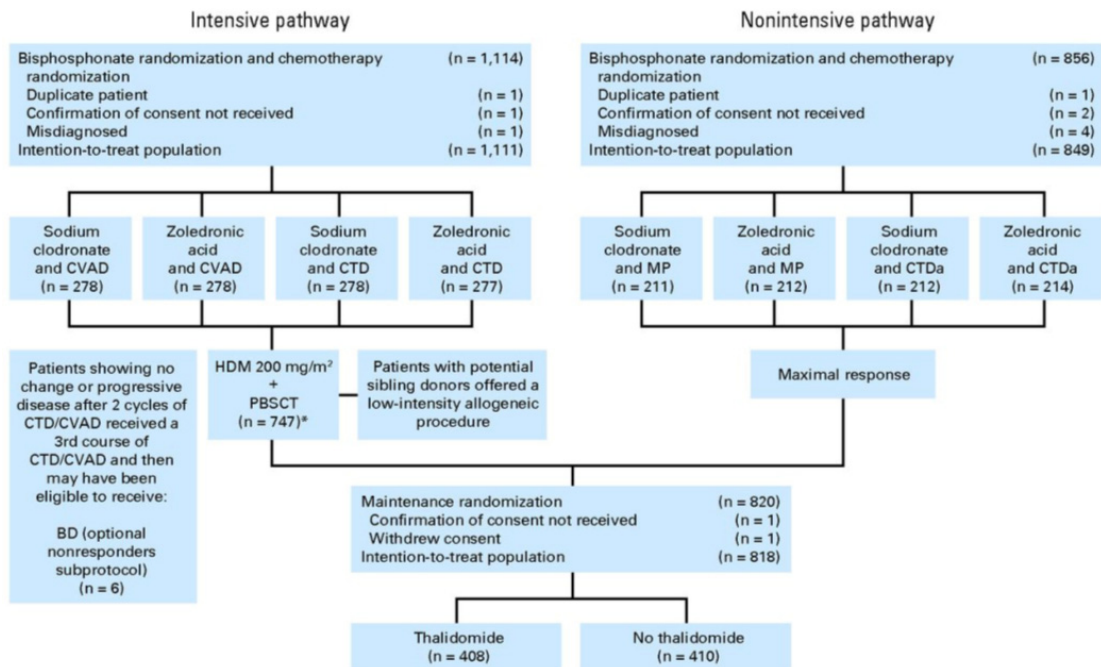

## SUPPLEMENTARY REFERENCES

1. Jackson GH, Davies FE, Pawlyn C, Cairns DA, Striha A, Collett C, *et al.* Lenalidomide maintenance versus observation for patients with newly diagnosed multiple myeloma (Myeloma XI): a multicentre, open-label, randomised, phase 3 trial. *The lancet oncology* 2019 Jan; **20**(1): 57-73.
2. Morgan GJ, Davies FE, Gregory WM, Bell SE, Szubert AJ, Cook G, *et al.* Long-term follow-up of MRC Myeloma IX trial: Survival outcomes with bisphosphonate and thalidomide treatment. *Clinical cancer research : an official journal of the American Association for Cancer Research* 2013 Nov 1; **19**(21): 6030-6038.
3. Shah V, Sherborne AL, Walker BA, Johnson DC, Boyle EM, Ellis S, *et al.* Prediction of outcome in newly diagnosed myeloma: a meta-analysis of the molecular profiles of 1905 trial patients. *Leukemia : official journal of the Leukemia Society of America, Leukemia Research Fund, UK* 2018 Jan; **32**(1): 102-110.
4. Kuiper R, Broyl A, de Knecht Y, van Vliet MH, van Beers EH, van der Holt B, *et al.* A gene expression signature for high-risk multiple myeloma. *Leukemia : official journal of the Leukemia Society of America, Leukemia Research Fund, UK* 2012 Nov; **26**(11): 2406-2413.
5. Shaughnessy JD, Jr., Qu P, Usmani S, Heuck CJ, Zhang Q, Zhou Y, *et al.* Pharmacogenomics of bortezomib test-dosing identifies hyperexpression of proteasome genes, especially PSMD4, as novel high-risk feature in myeloma treated with Total Therapy 3. *Blood* 2011 Sep 29; **118**(13): 3512-3524.
6. Shaughnessy JD, Zhan F, Burington BE, Huang Y, Colla S, Hanamura I, *et al.* A validated gene expression model of high-risk multiple myeloma is defined by deregulated expression of genes mapping to chromosome 1. *Blood* 2007 Mar 15; **109**(6): 2276-2284.
7. Dickens NJ, Walker BA, Leone PE, Johnson DC, Brito JL, Zeisig A, *et al.* Homozygous deletion mapping in myeloma samples identifies genes and an expression signature relevant to pathogenesis and outcome. *Clinical cancer research : an official journal of the American Association for Cancer Research* 2010 Mar 15; **16**(6): 1856-1864.
8. Decaux O, Lode L, Magrangeas F, Charbonnel C, Gouraud W, Jezequel P, *et al.* Prediction of survival in multiple myeloma based on gene expression profiles reveals cell cycle and chromosomal instability signatures in high-risk patients

and hyperdiploid signatures in low-risk patients: a study of the Intergroupe Francophone du Myelome. *Journal of clinical oncology : official journal of the American Society of Clinical Oncology* 2008 Oct 10; **26**(29): 4798-4805.

9. Moreaux J, Klein B, Bataille R, Descamps G, Maiga S, Hose D, *et al.* A high-risk signature for patients with multiple myeloma established from the molecular classification of human myeloma cell lines. *Haematologica* 2011 Apr; **96**(4): 574-582.

## **DATA-SHARING STATEMENT**

Gene expression data has been deposited under EGA accession EGAS00001004183; requests will be reviewed by the data access committee. Only non-commercial requests will be considered. De-identified participant data will be made available when all primary and secondary endpoints have been met. Requests for trial data and supporting material (data dictionary, protocol, and statistical-analysis plan) will be reviewed by the trial-management group in the first instance. Only requests that have a methodologically sound proposal and whose proposed use of the data has been approved by the independent trial steering committee will be considered. Proposals should be directed to the corresponding author in the first instance; to gain access, data requestors will need to sign a data access agreement.

## SUPPLEMENTARY TABLES

**Supplementary Table 1.** Baseline characteristics of representative transplant-eligible patients included in this analysis (left column), those not included (middle column) and all transplant-eligible trial patients (right column) from NCRI Myeloma XI.

|                                                    | <b>Current study (n=329)</b>           | <b>Others (n=1713)</b>                 | <b>Total (n=2042)</b>                  |
|----------------------------------------------------|----------------------------------------|----------------------------------------|----------------------------------------|
| Gender (Male)                                      | 197 (59.9%)                            | 1024 (59.8%)                           | 1221 (59.8%)                           |
| Age at randomization >65 years                     | 81 (24.6%)                             | 435 (25.4%)                            | 516 (25.3%)                            |
| <b>WHO performance status</b>                      |                                        |                                        |                                        |
| 0                                                  | 135 (41.0%)                            | 729 (42.6%)                            | 864 (42.3%)                            |
| 1                                                  | 124 (37.7%)                            | 608 (35.5%)                            | 732 (35.8%)                            |
| 2                                                  | 38 (11.6%)                             | 219 (12.8%)                            | 257 (12.6%)                            |
| 3                                                  | 16 (4.9%)                              | 62 (3.6%)                              | 78 (3.8%)                              |
| 4                                                  | 3 (0.9%)                               | 7 (0.4%)                               | 10 (0.5%)                              |
| <b>Haemoglobin (g/L) Mean (SD)</b>                 | 106.6 (19.01)                          | 110.0 (20.41)                          | 109.5 (20.23)                          |
| <b>Platelets (*10/L) Mean (SD)</b>                 | 248.3 (98.90)                          | 252.4 (101.78)                         | 251.7 (101.30)                         |
| <b>β2 microglobulin (mg/L) Median (Range)</b>      | 3.8 (1.5, 41.0)                        | 3.6 (0.6, 81.2)                        | 3.6 (0.6, 81.2)                        |
| <b>Calcium (mmol/l) Median (Range)</b>             | 2.4 (1.8, 3.8)                         | 2.4 (1.3, 4.6)                         | 2.4 (1.3, 4.6)                         |
| <b>Serum creatinine (μmol/L)</b>                   |                                        |                                        |                                        |
| Mean (SD)                                          | 102.8 (58.97)                          | 99.1 (62.45)                           | 99.7 (61.91)                           |
| Median (Range)                                     | 87.0 (37.0, 405.0)                     | 83.0 (28.0, 897.0)                     | 84.0 (28.0, 897.0)                     |
| <b>Paraprotein type</b>                            |                                        |                                        |                                        |
| IgG                                                | 196 (59.6%)                            | 1042 (60.8%)                           | 1238 (60.6%)                           |
| IgA                                                | 83 (25.2%)                             | 409 (23.9%)                            | 492 (24.1%)                            |
| <b>Light chain type</b>                            |                                        |                                        |                                        |
| Lambda                                             | 97 (29.5%)                             | 587 (34.3%)                            | 684 (33.5%)                            |
| Kappa                                              | 231 (70.2%)                            | 1106 (64.6%)                           | 1337 (65.5%)                           |
| <b>Serum Albumin (g/L) Mean (SD)</b>               | 34.6 (7.13)                            | 35.6 (6.88)                            | 35.4 (6.93)                            |
| <b>Lactate dehydrogenase (IU/L) Median (Range)</b> | 264.0 (<lower detection limit, 1042.0) | 268.0 (<lower detection limit, 3550.0) | 267.0 (<lower detection limit, 3550.0) |
| <b>C-Reactive protein (mg/L) &gt;=5</b>            | 168 (51.1%)                            | 880 (51.4%)                            | 1048 (51.3%)                           |



**Supplementary Table 2.** Baseline demographics, clinical and laboratory characteristics of patients with tumors classified as SKY92 standard-risk or high-risk.

|                                           | SKY92 Standard-Risk<br>(N=248) | SKY92 High-risk<br>(N=81) | P      |
|-------------------------------------------|--------------------------------|---------------------------|--------|
| <b>Demographics</b>                       |                                |                           |        |
| Age ≥ 65                                  | 58 (23.4)                      | 23 (28.4)                 | 0.447  |
| Gender (Male)                             | 152 (61.3)                     | 45 (55.6)                 | 0.433  |
| <b>Clinical Characteristics</b>           |                                |                           |        |
| WHO Performance Score ≥ 2 (%)             | 35 (14.9)                      | 22 (27.2)                 | 0.021  |
| ISS (%)                                   |                                |                           | 0.003  |
| I                                         | 83 (33.6)                      | 15 (18.5)                 |        |
| II                                        | 112 (45.3)                     | 35 (43.2)                 |        |
| III                                       | 52 (21.1)                      | 31 (38.3)                 |        |
| β2M mg/L (median [IQR])                   | 3.60 [2.70, 4.95]              | 4.50 [3.30, 6.90]         | 0.002  |
| Albumin <35g/dL (%)                       | 86 (34.7)                      | 38 (46.9)                 | 0.07   |
| CRP (median [IQR])                        | 3.10 [1.20, 9.50]              | 5.20 [1.05, 13.50]        | 0.247  |
| Serum Creatinine (median [IQR])           | 85.50 [71.00, 103.25]          | 91.00 [74.00, 118.00]     | 0.111  |
| Urea (median [IQR])                       | 5.50 [4.60, 7.50]              | 5.90 [4.60, 8.60]         | 0.108  |
| Haemoglobin g/L (mean (sd))               | 108.95 (18.21)                 | 99.53 (19.75)             | <0.001 |
| Platelets (mean (sd))                     | 261.95 (93.19)                 | 206.68 (104.66)           | <0.001 |
| Lactate dehydrogenase units/L (mean (sd)) | 269.18 (135.26)                | 363.19 (222.35)           | <0.001 |
| Calcium mmol/L > 2.6 (%)                  | 39 (15.8)                      | 23 (28.4)                 | 0.019  |
| Bone Disease (%)                          | 163 (70.9)                     | 47 (63.5)                 | 0.295  |
| <b>Genetic Characteristics</b>            |                                |                           |        |
| Adverse translocation (%)                 | 45 (18.1)                      | 35 (43.2)                 | <0.001 |
| t(4;14) (%)                               | 40 (16.1)                      | 28 (34.6)                 | 0.001  |
| t(14;16) or t(14;20) (%)                  | 5 (2.0)                        | 7 (8.6)                   | 0.016  |
| t(11;14) (%)                              | 49 (19.8)                      | 7 (8.6)                   | 0.032  |
| Hyperdiploid (%)                          | 134 (54.0)                     | 26 (32.1)                 | 0.001  |
| Gain(1q) [CKS1B] (%)                      | 70 (28.2)                      | 50 (61.7)                 | <0.001 |
| Del(1p) [CDKN2C] (%)                      | 17 (6.9)                       | 19 (23.5)                 | <0.001 |
| Del(17p) [TP53] (%)                       | 21 (8.5)                       | 13 (16.0)                 | 0.083  |
| Del(13q) (%)                              | 89 (35.9)                      | 54 (66.7)                 | <0.001 |

**Supplementary Table 3.** Cox-based univariate and multivariate analysis for induction randomization arms cyclophosphamide, thalidomide and dexamethasone (CTD) and cyclophosphamide, lenalidomide and dexamethasone (CRD).

| CTD Induction             |     | Univariate Analysis |             | Multivariate Analysis |                  |         |
|---------------------------|-----|---------------------|-------------|-----------------------|------------------|---------|
|                           |     | N                   | HR (95% CI) |                       |                  |         |
| Progression Free Survival |     |                     |             |                       |                  |         |
|                           | N   |                     |             |                       |                  |         |
|                           |     |                     |             |                       |                  |         |
| SKY92 high-risk           | 144 | 2.67 (1.78-4)       | 1.81E-06    | SKY92 high-risk       | 2.32 (1.41-3.84) | 0.001   |
| Hyperdiploid              | 144 | 0.62 (0.42-0.91)    | 0.0142      | Hyperdiploid          | 0.81 (0.54-1.22) | 0.317   |
| Adverse translocation     | 144 | 2.39 (1.59-3.58)    | 2.49E-05    | Adverse translocation | 1.94 (1.21-3.12) | 0.00577 |
| Del(1p) [CDKN2C]          | 144 | 1.74 (0.97-3.12)    | 0.0637      | Del(1p) [CDKN2C]      | 0.69 (0.32-1.46) | 0.329   |
| Del(17p) [TP53]           | 144 | 1.83 (1.06-3.17)    | 0.0308      | Del(17p) [TP53]       | 1.68 (0.86-3.29) | 0.132   |
| Gain(1q)                  | 144 | 1.55 (1.06-2.27)    | 0.0227      | Gain(1q)              | 0.89 (0.55-1.44) | 0.632   |
| ISS                       | 144 | 1.37 (1.08-1.75)    | 0.00987     | ISS                   | 1.1 (0.85-1.43)  | 0.477   |
| Age                       | 144 | 1.02 (1-1.05)       | 0.0612      | Age                   | 1.03 (1.01-1.06) | 0.0197  |

|                       |     |                  |          |
|-----------------------|-----|------------------|----------|
| Overall Survival      |     |                  |          |
|                       | N   | HR (95% CI)      | Wald P   |
| SKY92 high-risk       | 144 | 3.51 (2.14-5.76) | 6.71E-07 |
| Hyperdiploid          | 144 | 0.81 (0.49-1.33) | 0.404    |
| Adverse translocation | 144 | 2.1 (1.27-3.48)  | 0.00374  |
| Del(1p) [CDKN2C]      | 144 | 2.69 (1.4-5.17)  | 0.00303  |
| Del(17p) [TP53]       | 144 | 2.85 (1.51-5.38) | 0.00125  |
| Gain(1q)              | 144 | 2.49 (1.52-4.09) | 0.000319 |
| ISS                   | 144 | 1.45 (1.04-2.02) | 0.0273   |
| Age                   | 144 | 1.02 (0.99-1.06) | 0.178    |

|                       |                  |         |
|-----------------------|------------------|---------|
| Overall Survival      |                  |         |
|                       | HR (95% CI)      | Wald P  |
| SKY92 high-risk       | 2.64 (1.42-4.91) | 0.00213 |
| Hyperdiploid          | 1.07 (0.63-1.83) | 0.792   |
| Adverse translocation | 1.52 (0.82-2.81) | 0.182   |
| Del(1p) [CDKN2C]      | 0.97 (0.43-2.16) | 0.936   |
| Del(17p) [TP53]       | 2.55 (1.18-5.5)  | 0.0174  |
| Gain(1q)              | 1.27 (0.68-2.37) | 0.445   |
| ISS                   | 1.1 (0.76-1.61)  | 0.607   |
| Age                   | 1.02 (0.98-1.06) | 0.323   |

| CRD Induction             |     | Univariate Analysis |             | Multivariate Analysis |                  |         |
|---------------------------|-----|---------------------|-------------|-----------------------|------------------|---------|
| Progression Free Survival |     | N                   | HR (95% CI) | Wald P                |                  |         |
| SKY92 high-risk           | 185 | 2.45 (1.63-3.68)    | 1.67E-05    | SKY92 high-risk       | 2.01 (1.3-3.13)  | 0.00187 |
| Hyperdiploid              | 185 | 0.87 (0.61-1.25)    | 0.454       | Hyperdiploid          | 1.1 (0.72-1.67)  | 0.668   |
| Adverse translocation     | 185 | 1.69 (1.1-2.58)     | 0.0156      | Adverse translocation | 2 (1.22-3.28)    | 0.00623 |
| Del(1p) [CDKN2C]          | 185 | 1.38 (0.81-2.33)    | 0.237       | Del(1p) [CDKN2C]      | 1.24 (0.7-2.18)  | 0.46    |
| Del(17p) [TP53]           | 185 | 1.44 (0.81-2.57)    | 0.215       | Del(17p) [TP53]       | 1.28 (0.72-2.3)  | 0.403   |
| Gain(1q)                  | 185 | 1.3 (0.89-1.89)     | 0.174       | Gain(1q)              | 0.86 (0.57-1.31) | 0.489   |
| ISS                       | 184 | 1.32 (1.03-1.69)    | 0.0256      | ISS                   | 1.15 (0.89-1.5)  | 0.284   |
| Age                       | 185 | 1.05 (1.02-1.08)    | 0.00069     | Age                   | 1.04 (1.01-1.07) | 0.0038  |

|                       |                  |          |
|-----------------------|------------------|----------|
| Overall Survival      |                  |          |
|                       | HR (95% CI)      | Wald P   |
| SKY92 high-risk       | 3.19 (1.76-5.8)  | 0.000139 |
| Hyperdiploid          | 0.84 (0.41-1.69) | 0.619    |
| Adverse translocation | 2.69 (1.32-5.46) | 0.00626  |
| Del(1p) [CDKN2C]      | 1.83 (0.87-3.87) | 0.113    |
| Del(17p) [TP53]       | 2.51 (1.17-5.37) | 0.0176   |
| Gain(1q)              | 1.38 (0.76-2.52) | 0.293    |
| ISS                   | 1.11 (0.75-1.65) | 0.601    |
| Age                   | 1.01 (0.97-1.05) | 0.624    |

|                       |     |                  |          |
|-----------------------|-----|------------------|----------|
| Overall Survival      |     |                  |          |
|                       | N   | HR (95% CI)      | Wald P   |
| SKY92 high-risk       | 185 | 4.22 (2.43-7.32) | 2.96E-07 |
| Hyperdiploid          | 185 | 0.46 (0.26-0.8)  | 0.00643  |
| Adverse translocation | 185 | 2.9 (1.64-5.11)  | 0.000234 |
| Del(1p) [CDKN2C]      | 185 | 2.29 (1.17-4.48) | 0.015    |
| Del(17p) [TP53]       | 185 | 3.04 (1.47-6.28) | 0.00262  |
| Gain(1q)              | 185 | 2.12 (1.23-3.65) | 0.00678  |
| ISS                   | 184 | 1.36 (0.94-1.97) | 0.0994   |
| Age                   | 185 | 1.03 (0.99-1.07) | 0.154    |

|                       |                  |          |
|-----------------------|------------------|----------|
| Overall Survival      |                  |          |
|                       | HR (95% CI)      | Wald P   |
| SKY92 high-risk       | 3.19 (1.76-5.8)  | 0.000139 |
| Hyperdiploid          | 0.84 (0.41-1.69) | 0.619    |
| Adverse translocation | 2.69 (1.32-5.46) | 0.00626  |
| Del(1p) [CDKN2C]      | 1.83 (0.87-3.87) | 0.113    |
| Del(17p) [TP53]       | 2.51 (1.17-5.37) | 0.0176   |
| Gain(1q)              | 1.38 (0.76-2.52) | 0.293    |
| ISS                   | 1.11 (0.75-1.65) | 0.601    |
| Age                   | 1.01 (0.97-1.05) | 0.624    |

**Supplementary Table 4.** Cox-based univariate and multivariate analysis landmarked from time point of HDMEL and ASCT for PFS and OS.

|                           |     |          | Univariate Analysis |          | Multivariate Analysis     |                      |          |
|---------------------------|-----|----------|---------------------|----------|---------------------------|----------------------|----------|
| Progression Free Survival |     |          |                     |          | Progression Free Survival |                      |          |
|                           | N   | n events | HR (95% CI)         | Wald P   |                           | HR (95% CI)          | Wald P   |
| SKY92 high-risk           | 205 | 123      | 2.95 (2-4.37)       | 5.99E-08 | SKY92 high-risk           | 2.53 ( 1.61 - 3.97 ) | 5.22E-05 |
| Adverse translocation     | 205 | 123      | 2.19 (1.48-3.24)    | 8.82E-05 | Adverse translocation     | 2.25 ( 1.44 - 3.5 )  | 0.000341 |
| Del(1p) [CDKN2C]          | 205 | 123      | 1.72 (1.02-2.92)    | 0.0434   | Del(1p) [CDKN2C]          | 1.07 ( 0.59 - 1.95 ) | 0.826    |
| Del(17p) [TP53]           | 205 | 123      | 2.12 (1.27-3.55)    | 0.00412  | Del(17p) [TP53]           | 1.63 ( 0.95 - 2.8 )  | 0.0765   |
| Gain(1q)                  | 205 | 123      | 1.62 (1.13-2.32)    | 0.00916  | Gain(1q)                  | 0.97 ( 0.63 - 1.5 )  | 0.902    |
| Hyperdiploid              | 205 | 123      | 0.84 (0.59-1.19)    | 0.326    | Hyperdiploid              | 1.12 ( 0.76 - 1.66 ) | 0.567    |
| Age                       | 205 | 123      | 1.03 (1.01-1.06)    | 0.00781  | Age                       | 1.04 ( 1.01 - 1.06 ) | 0.00676  |
| ISS                       | 204 | 123      | 1.2 (0.94-1.52)     | 0.136    | ISS                       | 0.97 ( 0.76 - 1.25 ) | 0.825    |
| Double-hit                | 205 | 123      | 3.17 (2.1-4.8)      | 4.47E-08 |                           |                      |          |
|                           |     |          |                     |          |                           |                      |          |
| Overall Survival          |     |          |                     |          | Overall Survival          |                      |          |
|                           | N   | n events | HR (95% CI)         | Wald P   |                           | HR (95% CI)          | Wald P   |
| SKY92 high-risk           | 205 | 56       | 3.93 (2.31-6.69)    | 4.76E-07 | SKY92 high-risk           | 2.92 ( 1.57 - 5.42 ) | 0.000675 |
| Adverse translocation     | 205 | 56       | 2.26 (1.31-3.9)     | 0.00357  | Adverse translocation     | 2.01 ( 1.05 - 3.82 ) | 0.0346   |
| Del(1p) [CDKN2C]          | 205 | 56       | 3.5 (1.83-6.71)     | 0.000161 | Del(1p) [CDKN2C]          | 1.55 ( 0.73 - 3.31 ) | 0.254    |
| Del(17p) [TP53]           | 205 | 56       | 4.76 (2.58-8.77)    | 5.69E-07 | Del(17p) [TP53]           | 3.94 ( 2 - 7.76 )    | 7.13E-05 |
| Gain(1q)                  | 205 | 56       | 2.91 (1.71-4.94)    | 8.16E-05 | Gain(1q)                  | 1.67 ( 0.9 - 3.12 )  | 0.105    |
| Hyperdiploid              | 205 | 56       | 0.77 (0.46-1.3)     | 0.334    | Hyperdiploid              | 1.28 ( 0.69 - 2.37 ) | 0.438    |
| Age                       | 205 | 56       | 1.02 (0.99-1.06)    | 0.256    | Age                       | 1 ( 0.96 - 1.04 )    | 0.989    |
| ISS                       | 204 | 56       | 1.19 (0.83-1.7)     | 0.337    | ISS                       | 0.91 ( 0.62 - 1.34 ) | 0.637    |
| Double-hit                | 205 | 56       | 5.03 (2.93-8.64)    | 4.98E-09 |                           |                      |          |

**Supplementary Table 5.** Cox-based univariate and multivariate analysis landmarked from time point of maintenance randomization to lenalidomide or observation for PFS and OS.

|                                              |     |          | Univariate Analysis |          |
|----------------------------------------------|-----|----------|---------------------|----------|
| Progression Free Survival                    |     |          |                     |          |
|                                              | N   | n events | HR (95% CI)         | Wald P   |
| SKY92 high-risk                              | 149 | 87       | 3.34 (2.1-5.31)     | 3.55E-07 |
| Adverse translocation                        | 149 | 87       | 2.09 (1.3-3.36)     | 0.00234  |
| Del(1p) [CDKN2C]                             | 149 | 87       | 1.77 (0.88-3.55)    | 0.108    |
| Del(17p) [TP53]                              | 149 | 87       | 2.05 (1.13-3.71)    | 0.0176   |
| Gain(1q)                                     | 149 | 87       | 1.73 (1.12-2.66)    | 0.0128   |
| Hyperdiploid                                 | 149 | 87       | 0.84 (0.55-1.28)    | 0.427    |
| Age                                          | 149 | 87       | 1.03 (1-1.07)       | 0.0258   |
| ISS                                          | 148 | 87       | 1.17 (0.89-1.54)    | 0.257    |
| Maintenance Randomization Len vs Observation | 149 | 87       | 0.42 (0.27-0.65)    | 0.000116 |

|                                              |                  |          | Multivariate Analysis |  |
|----------------------------------------------|------------------|----------|-----------------------|--|
| Progression Free Survival                    |                  |          |                       |  |
|                                              | HR (95% CI)      | Wald P   |                       |  |
| SKY92 high-risk                              | 2.61 (1.54-4.41) | 0.000343 |                       |  |
| Adverse translocation                        | 2.01 (1.15-3.51) | 0.0142   |                       |  |
| Del(1p) [CDKN2C]                             | 1.35 (0.6-3.05)  | 0.475    |                       |  |
| Del(17p) [TP53]                              | 1.94 (1.02-3.72) | 0.0444   |                       |  |
| Gain(1q)                                     | 1.31 (0.77-2.21) | 0.32     |                       |  |
| Hyperdiploid                                 | 1.09 (0.67-1.76) | 0.739    |                       |  |
| Age                                          | 1.03 (1-1.06)    | 0.0811   |                       |  |
| ISS                                          | 0.92 (0.69-1.22) | 0.563    |                       |  |
| Maintenance Randomization Len vs Observation | 0.34 (0.21-0.54) | 6.74E-06 |                       |  |

| Overall Survival                             |     |          |                  |          |
|----------------------------------------------|-----|----------|------------------|----------|
|                                              | N   | n events | HR (95% CI)      | Wald P   |
| SKY92 high-risk                              | 149 | 38       | 3.92 (2.04-7.54) | 4.23E-05 |
| Adverse translocation                        | 149 | 38       | 2.18 (1.11-4.26) | 0.0231   |
| Del(1p) [CDKN2C]                             | 149 | 38       | 3.2 (1.39-7.36)  | 0.00607  |
| Del(17p) [TP53]                              | 149 | 38       | 4.29 (2.08-8.87) | 8.33E-05 |
| Gain(1q)                                     | 149 | 38       | 3.18 (1.67-6.07) | 0.00045  |
| Hyperdiploid                                 | 149 | 38       | 0.85 (0.45-1.62) | 0.63     |
| Age                                          | 149 | 38       | 1.03 (0.98-1.07) | 0.245    |
| ISS                                          | 148 | 38       | 1.09 (0.72-1.66) | 0.677    |
| Maintenance Randomization Len vs Observation | 149 | 38       | 0.88 (0.47-1.67) | 0.707    |

| Overall Survival                             |                  |          | HR (95% CI) | Wald P |
|----------------------------------------------|------------------|----------|-------------|--------|
| SKY92 high-risk                              | 3.13 (1.46-6.71) | 0.00324  |             |        |
| Adverse translocation                        | 1.84 (0.81-4.16) | 0.144    |             |        |
| Del(1p) [CDKN2C]                             | 1.26 (0.48-3.35) | 0.637    |             |        |
| Del(17p) [TP53]                              | 4.4 (1.94-9.99)  | 0.000401 |             |        |
| Gain(1q)                                     | 2.4 (1.11-5.17)  | 0.0257   |             |        |
| Hyperdiploid                                 | 1.34 (0.61-2.94) | 0.466    |             |        |
| Age                                          | 1 (0.95-1.05)    | 0.968    |             |        |
| ISS                                          | 0.82 (0.53-1.28) | 0.381    |             |        |
| Maintenance Randomization Len vs Observation | 0.56 (0.28-1.14) | 0.108    |             |        |

**Supplementary Table 6.** Cox-based univariate and multivariate analysis from trial entry for PFS and OS with UAMS GEP70 risk status.

**Progression Free Survival**

|                         | N   | events | Univariate analysis |               |
|-------------------------|-----|--------|---------------------|---------------|
|                         |     |        | HR (95% CI)         | Wald <i>P</i> |
| UAMS70 High-risk        | 329 | 232    | 1.86 (1.34-2.59)    | 0.000234      |
| Del(1p) [CDKN2C]        | 329 | 232    | 1.47 (1-2.18)       | 0.0514        |
| Del(17p) [TP53]         | 329 | 232    | 1.63 (1.09-2.42)    | 0.016         |
| Gain(1q)                | 329 | 232    | 1.44 (1.11-1.88)    | 0.00634       |
| Adverse translocation   | 329 | 232    | 2.04 (1.53-2.72)    | 1.12E-06      |
| Hyperdiploid            | 329 | 232    | 0.74 (0.57-0.95)    | 0.0198        |
| ISS                     | 328 | 232    | 1.33 (1.12-1.58)    | 0.0012        |
| Age                     | 329 | 232    | 1.04 (1.02-1.06)    | 0.000115      |
| Induction Randomization | 329 | 232    | 1.31 (1.01-1.69)    | 0.0417        |

|                         | Multivariate analysis |               |
|-------------------------|-----------------------|---------------|
|                         | HR (95% CI)           | Wald <i>P</i> |
| UAMS70 High-risk        | 1.37 ( 0.91 - 2.04 )  | 0.129         |
| Del(1p) [CDKN2C]        | 1.04 ( 0.66 - 1.64 )  | 0.867         |
| Del(17p) [TP53]         | 1.35 ( 0.89 - 2.05 )  | 0.163         |
| Gain(1q)                | 1.02 ( 0.75 - 1.38 )  | 0.891         |
| Adverse translocation   | 2.01 ( 1.45 - 2.79 )  | 0.00003       |
| Hyperdiploid            | 0.93 ( 0.7 - 1.23 )   | 0.605         |
| ISS                     | 1.17 ( 0.97 - 1.4 )   | 0.106         |
| Age                     | 1.04 ( 1.02 - 1.06 )  | 0.000143      |
| Induction Randomization | 1.21 ( 0.93 - 1.57 )  | 0.152         |

**Overall Survival**

|                         | N   | events | Univariate analysis |               |
|-------------------------|-----|--------|---------------------|---------------|
|                         |     |        | HR (95% CI)         | Wald <i>P</i> |
| UAMS70 High-risk        | 329 | 117    | 3.79 (2.55-5.65)    | 5.51E-11      |
| Del(1p) [CDKN2C]        | 329 | 117    | 2.38 (1.49-3.79)    | 0.000271      |
| Del(17p) [TP53]         | 329 | 117    | 3.02 (1.87-4.87)    | 5.76E-06      |
| Gain(1q)                | 329 | 117    | 2.39 (1.66-3.44)    | 2.98E-06      |
| Adverse translocation   | 329 | 117    | 2.5 (1.72-3.64)     | 1.67E-06      |
| Hyperdiploid            | 329 | 117    | 0.6 (0.42-0.87)     | 0.00717       |
| ISS                     | 328 | 117    | 1.38 (1.08-1.76)    | 0.0101        |
| Age                     | 329 | 117    | 1.03 (1-1.05)       | 0.033         |
| Induction Randomization | 329 | 117    | 1.6 (1.11-2.31)     | 0.0113        |

|                         | Multivariate analysis |               |
|-------------------------|-----------------------|---------------|
|                         | HR (95% CI)           | Wald <i>P</i> |
| UAMS70 High-risk        | 2.54 ( 1.56 - 4.13 )  | 0.000175      |
| Del(1p) [CDKN2C]        | 1.19 ( 0.68 - 2.08 )  | 0.545         |
| Del(17p) [TP53]         | 2.22 ( 1.32 - 3.72 )  | 0.00253       |
| Gain(1q)                | 1.39 ( 0.91 - 2.12 )  | 0.125         |
| Adverse translocation   | 2.11 ( 1.35 - 3.28 )  | 0.000951      |
| Hyperdiploid            | 0.95 ( 0.62 - 1.44 )  | 0.806         |
| ISS                     | 1.1 ( 0.84 - 1.43 )   | 0.505         |
| Age                     | 1.02 ( 1 - 1.05 )     | 0.0972        |
| Induction Randomization | 1.39 ( 0.96 - 2.02 )  | 0.079         |

**Supplementary Table 7.** Cox-based univariate and multivariate survival analysis of prognostic association of molecular or clinical variables for 161 patients without MPCA risk markers.

|                           |     | Univariate Analysis |                  |               |
|---------------------------|-----|---------------------|------------------|---------------|
| Progression Free Survival |     |                     |                  |               |
|                           | N   | events              | HR (95% CI)      | Wald <i>P</i> |
| SKY92 high-risk           | 161 | 104                 | 3.91 (2.34-6.54) | 1.85E-07      |
| Del(1p) [CDKN2C]          | 161 | 104                 | 3.48 (1.73-7)    | 0.000464      |
| Hyperdiploidy             | 161 | 104                 | 1.1 (0.73-1.65)  | 0.66          |
| Age                       | 161 | 104                 | 1.05 (1.02-1.08) | 0.00157       |
| Induction CTD vs CRD      | 161 | 104                 | 1.02 (0.69-1.5)  | 0.933         |
| ISS                       | 161 | 104                 | 1.23 (0.96-1.58) | 0.0991        |

|                           |  | Multivariate Analysis |               |
|---------------------------|--|-----------------------|---------------|
| Progression Free Survival |  |                       |               |
|                           |  | HR (95% CI)           | Wald <i>P</i> |
| SKY92 high-risk           |  | 3.18 (1.86-5.46)      | 2.57E-05      |
| Del(1p) [CDKN2C]          |  | 2.26 (1.07-4.78)      | 0.0335        |
| Hyperdiploidy             |  | 1.14 (0.75-1.73)      | 0.529         |
| Age                       |  | 1.04 (1.01-1.06)      | 0.0162        |
| Induction CTD vs CRD      |  | 1.05 (0.69-1.58)      | 0.834         |
| ISS                       |  | 1.09 (0.85-1.41)      | 0.496         |

| Overall Survival     |     |        |                  |               |
|----------------------|-----|--------|------------------|---------------|
|                      | N   | events | HR (95% CI)      | Wald <i>P</i> |
| SKY92 high-risk      | 161 | 35     | 3.51 (1.68-7.31) | 0.000809      |
| Del(1p) [CDKN2C]     | 161 | 35     | 3.36 (1.3-8.68)  | 0.0124        |
| Hyperdiploidy        | 161 | 35     | 0.95 (0.48-1.89) | 0.884         |
| Age                  | 161 | 35     | 1.02 (0.97-1.06) | 0.448         |
| Induction CTD vs CRD | 161 | 35     | 1.59 (0.82-3.1)  | 0.172         |
| ISS                  | 161 | 35     | 1.5 (0.97-2.32)  | 0.0656        |

| Overall Survival     |  |                  |               |
|----------------------|--|------------------|---------------|
|                      |  | HR (95% CI)      | Wald <i>P</i> |
| SKY92 high-risk      |  | 2.42 (1.04-5.67) | 0.0412        |
| Del(1p) [CDKN2C]     |  | 2.33 (0.77-7.06) | 0.134         |
| Hyperdiploidy        |  | 1.03 (0.5-2.13)  | 0.927         |
| Age                  |  | 1 (0.95-1.05)    | 0.951         |
| Induction CTD vs CRD |  | 1.78 (0.87-3.62) | 0.113         |
| ISS                  |  | 1.37 (0.87-2.15) | 0.177         |

**Supplementary Table 8.** Cox based univariate and multivariate analysis of PFS and OS from time point of a) induction randomization b) maintenance randomization.

| <b>a) From induction randomization</b> |                     |        |                       |                           |                      |                      |               |
|----------------------------------------|---------------------|--------|-----------------------|---------------------------|----------------------|----------------------|---------------|
| Progression Free Survival              |                     |        |                       | Progression Free Survival |                      |                      |               |
|                                        | Univariate Analysis |        | Multivariate Analysis |                           |                      |                      |               |
|                                        | N                   | events | HR (95% CI)           | Wald <i>P</i>             |                      | HR (95% CI)          | Wald <i>P</i> |
| SKY92 high-risk                        | 329                 | 232    | 2.6 (1.96-3.45)       | 4.08E-11                  | SKY92 high-risk      | 2.02 ( 1.49 - 2.75 ) | 6.76E-06      |
| Double-Hit                             | 329                 | 232    | 2.36 (1.73-3.22)      | 5.43E-08                  | Double-Hit           | 1.64 ( 1.16 - 2.31 ) | 0.00499       |
| Hyperdiploid                           | 329                 | 232    | 0.74 (0.57-0.95)      | 0.0198                    | Hyperdiploid         | 0.85 ( 0.65 - 1.12 ) | 0.248         |
| ISS                                    | 328                 | 232    | 1.33 (1.12-1.58)      | 0.0012                    | ISS                  | 1.15 ( 0.96 - 1.38 ) | 0.12          |
| Age                                    | 329                 | 232    | 1.04 (1.02-1.06)      | 0.000115                  | Age                  | 1.03 ( 1.01 - 1.05 ) | 0.000866      |
| Induction CTD vs CRD                   | 329                 | 232    | 1.31 (1.01-1.69)      | 0.0417                    | Induction CTD vs CRD | 1.18 ( 0.91 - 1.53 ) | 0.223         |
| Overall Survival                       |                     |        |                       | Overall Survival          |                      |                      |               |
|                                        | Univariate Analysis |        | Multivariate Analysis |                           |                      |                      |               |
|                                        | N                   | events | HR (95% CI)           | Wald <i>P</i>             |                      | HR (95% CI)          | Wald <i>P</i> |
| SKY92 high-risk                        | 329                 | 117    | 3.94 (2.73-5.69)      | 2.54E-13                  | SKY92 high-risk      | 2.85 ( 1.91 - 4.24 ) | 2.63E-07      |
| Double-hit                             | 329                 | 117    | 3.72 (2.54-5.47)      | 1.98E-11                  | Double-hit           | 2.3 ( 1.49 - 3.57 )  | 0.000193      |
| Hyperdiploid                           | 329                 | 117    | 0.6 (0.42-0.87)       | 0.00717                   | Hyperdiploid         | 0.83 ( 0.56 - 1.24 ) | 0.373         |
| ISS                                    | 328                 | 117    | 1.38 (1.08-1.76)      | 0.0101                    | ISS                  | 1.15 ( 0.88 - 1.49 ) | 0.315         |
| Age                                    | 329                 | 117    | 1.03 (1-1.05)         | 0.033                     | Age                  | 1.02 ( 0.99 - 1.04 ) | 0.263         |
| Induction CTD vs CRD                   | 329                 | 117    | 1.6 (1.11-2.31)       | 0.0113                    | Induction CTD vs CRD | 1.27 ( 0.87 - 1.85 ) | 0.218         |

| <b>b) Landmarked from maintenance randomization</b> |                     |        |                       |                           |                        |                      |               |
|-----------------------------------------------------|---------------------|--------|-----------------------|---------------------------|------------------------|----------------------|---------------|
| Progression Free Survival                           |                     |        |                       | Progression Free Survival |                        |                      |               |
|                                                     | Univariate Analysis |        | Multivariate Analysis |                           |                        |                      |               |
|                                                     | N                   | events | HR (95% CI)           | Wald <i>P</i>             |                        | HR (95% CI)          | Wald <i>P</i> |
| SKY92 high-risk                                     | 149                 | 87     | 3.34 (2.1-5.31)       | 3.55E-07                  | SKY92 high-risk        | 2.71 ( 1.64 - 4.48 ) | 9.64E-05      |
| Double-Hit                                          | 149                 | 87     | 3.15 (1.93-5.13)      | 4.28E-06                  | Double-Hit             | 2.78 ( 1.61 - 4.8 )  | 0.000246      |
| Hyperdiploid                                        | 149                 | 87     | 0.84 (0.55-1.28)      | 0.427                     | Hyperdiploid           | 1.02 ( 0.65 - 1.62 ) | 0.918         |
| ISS                                                 | 148                 | 87     | 1.17 (0.89-1.54)      | 0.257                     | ISS                    | 0.92 ( 0.7 - 1.22 )  | 0.571         |
| Age                                                 | 149                 | 87     | 1.03 (1-1.07)         | 0.0258                    | Age                    | 1.03 ( 0.99 - 1.06 ) | 0.107         |
| Maintenance Len vs Obs                              | 149                 | 87     | 0.42 (0.27-0.65)      | 0.000116                  | Maintenance Len vs Obs | 0.39 ( 0.25 - 0.6 )  | 2.73E-05      |
| Overall Survival                                    |                     |        |                       | Overall Survival          |                        |                      |               |
|                                                     | Univariate Analysis |        | Multivariate Analysis |                           |                        |                      |               |
|                                                     | N                   | events | HR (95% CI)           | Wald <i>P</i>             |                        | HR (95% CI)          | Wald <i>P</i> |
| SKY92 high-risk                                     | 149                 | 38     | 3.92 (2.04-7.54)      | 4.23E-05                  | SKY92 high-risk        | 3.31 ( 1.64 - 6.69 ) | 0.000866      |
| Double-hit                                          | 149                 | 38     | 4.74 (2.46-9.14)      | 3.27E-06                  | Double-Hit             | 4.58 ( 2.15 - 9.79 ) | 8.36E-05      |
| Hyperdiploid                                        | 149                 | 38     | 0.85 (0.45-1.62)      | 0.63                      | Hyperdiploid           | 1.25 ( 0.61 - 2.56 ) | 0.544         |
| ISS                                                 | 148                 | 38     | 1.09 (0.72-1.66)      | 0.677                     | ISS                    | 0.79 ( 0.52 - 1.23 ) | 0.298         |
| Age                                                 | 149                 | 38     | 1.03 (0.98-1.07)      | 0.245                     | Age                    | 1.01 ( 0.96 - 1.05 ) | 0.776         |
| Maintenance Len vs Obs                              | 149                 | 38     | 0.88 (0.47-1.67)      | 0.707                     | Maintenance Len vs Obs | 0.77 ( 0.4 - 1.5 )   | 0.449         |

**Supplementary Table 9.** Cox based multivariable analysis of PFS and OS from time point of a) Induction randomization and b) transplant consolidation of cytogenetic and SKY92 risk scoring strata.

a) **Multivariate analysis**

Progression Free Survival

|                                | HR (95% CI)          | Wald <i>P</i> |
|--------------------------------|----------------------|---------------|
| No high-risk                   | 1                    | n/a           |
| 1 cytogenetic high-risk lesion | 1.32 ( 0.93 - 1.86 ) | 0.118         |
| Double-hit OR SKY92 high-risk  | 2.34 ( 1.68 - 3.26 ) | 4.44E-07      |
| Double-hit AND SKY92 high-risk | 4.5 ( 2.96 - 6.86 )  | 2.25E-12      |

Overall Survival

|                                | HR (95% CI)            | Wald <i>P</i> |
|--------------------------------|------------------------|---------------|
| No high-risk                   | 1                      | n/a           |
| 1 cytogenetic high-risk lesion | 1.88 ( 1.08 - 3.28 )   | 0.0255        |
| Double-hit OR SKY92 high-risk  | 3.8 ( 2.3 - 6.29 )     | 2.00E-07      |
| Double-hit AND SKY92 high-risk | 10.98 ( 6.32 - 19.09 ) | 2.01E-17      |

b) **Multivariate Analysis**

Progression Free Survival

|                                | HR (95% CI)          | Wald <i>P</i> |
|--------------------------------|----------------------|---------------|
| No high-risk                   | 1                    | n/a           |
| 1 cytogenetic high-risk lesion | 1.12 ( 0.68 - 1.83 ) | 0.653         |
| Double-hit OR SKY92 high-risk  | 2.61 ( 1.68 - 4.08 ) | 2.31E-05      |
| Double-hit AND SKY92 high-risk | 6.2 ( 3.49 - 11.02 ) | 4.59E-10      |

Overall Survival

|                                | HR (95% CI)            | Wald <i>P</i> |
|--------------------------------|------------------------|---------------|
| No high-risk                   | 1                      | n/a           |
| 1 cytogenetic high-risk lesion | 1.65 ( 0.74 - 3.69 )   | 0.221         |
| Double-hit OR SKY92 high-risk  | 3.59 ( 1.76 - 7.34 )   | 0.000454      |
| Double-hit AND SKY92 high-risk | 14.47 ( 6.69 - 31.26 ) | 1.08E-11      |



**Supplementary Table 10.** Cox based multivariable analysis of PFS and OS from induction randomization including LDH, other clinical and molecular risk markers.

**Multivariate Analysis**

Progression Free Survival

|                               | HR (95% CI)          | Wald <i>P</i> |
|-------------------------------|----------------------|---------------|
| SKY92 high-risk               | 1.9 ( 1.34 - 2.69 )  | 0.000282      |
| Double-hit                    | 1.84 ( 1.28 - 2.65 ) | 0.000953      |
| ISS                           | 1.09 ( 0.9 - 1.33 )  | 0.373         |
| Age                           | 1.03 ( 1.01 - 1.05 ) | 0.00221       |
| Induction CTD vs CRD          | 1.13 ( 0.85 - 1.5 )  | 0.404         |
| Lactate dehydrogenase units/L | 1 ( 1 - 1 )          | 0.805         |

Overall Survival

|                               | HR (95% CI)          | Wald <i>P</i> |
|-------------------------------|----------------------|---------------|
| SKY92 high-risk               | 3.01 ( 1.93 - 4.7 )  | 1.30E-06      |
| Double-hit                    | 2.24 ( 1.41 - 3.57 ) | 0.000631      |
| ISS                           | 1.12 ( 0.84 - 1.49 ) | 0.449         |
| Age                           | 1.02 ( 0.99 - 1.05 ) | 0.156         |
| Induction CTD vs CRD          | 1.25 ( 0.83 - 1.9 )  | 0.284         |
| Lactate dehydrogenase units/L | 1 ( 1 - 1 )          | 0.283         |

# SUPPLEMENTARY FIGURES

## Supplementary Figure 1

Kaplan-Meier plot of the analyzed representative NCRI Myeloma XI trial patients (n=329) in context of SKY92 risk profiling results for A) PFS, B) OS from induction randomization. Log-rank *P*-values displayed.

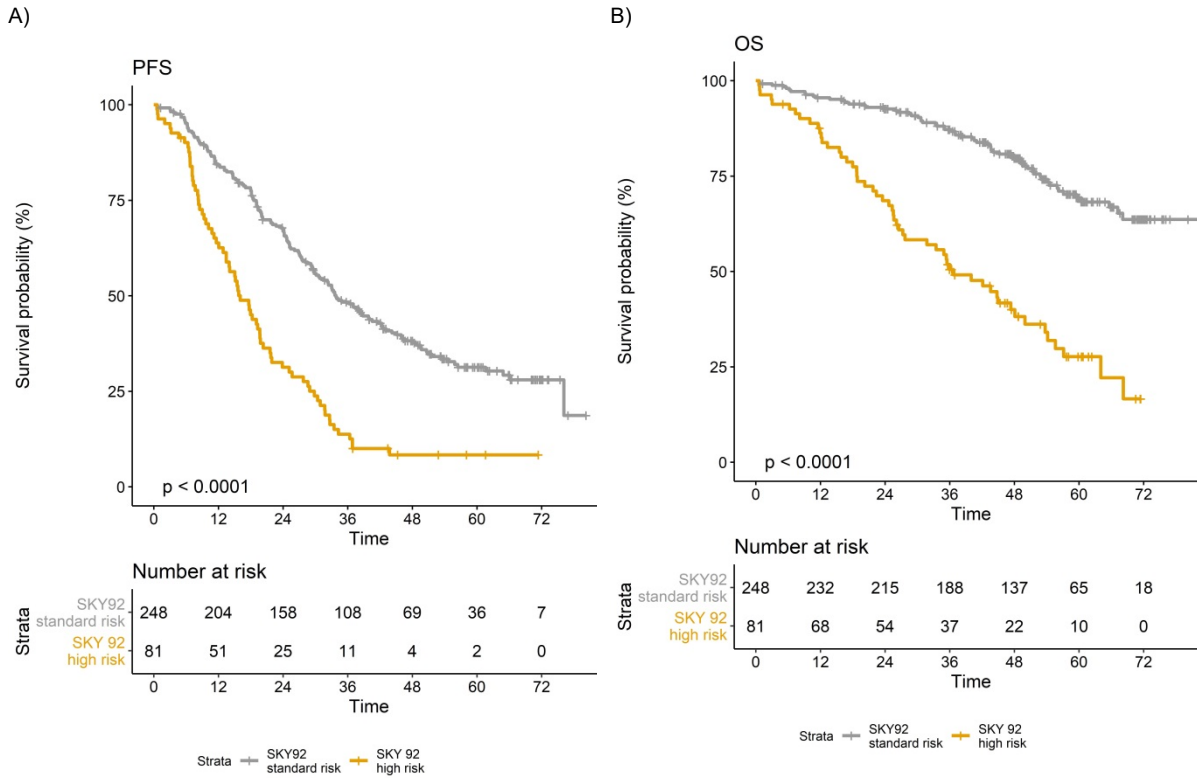

## Supplementary Figure 2

Kaplan-Meier plots for groups defined by presence or absence of SKY92 GEP risk status in patients randomised (ITT) to induction with CTD (A, B) or CRD (C, D).

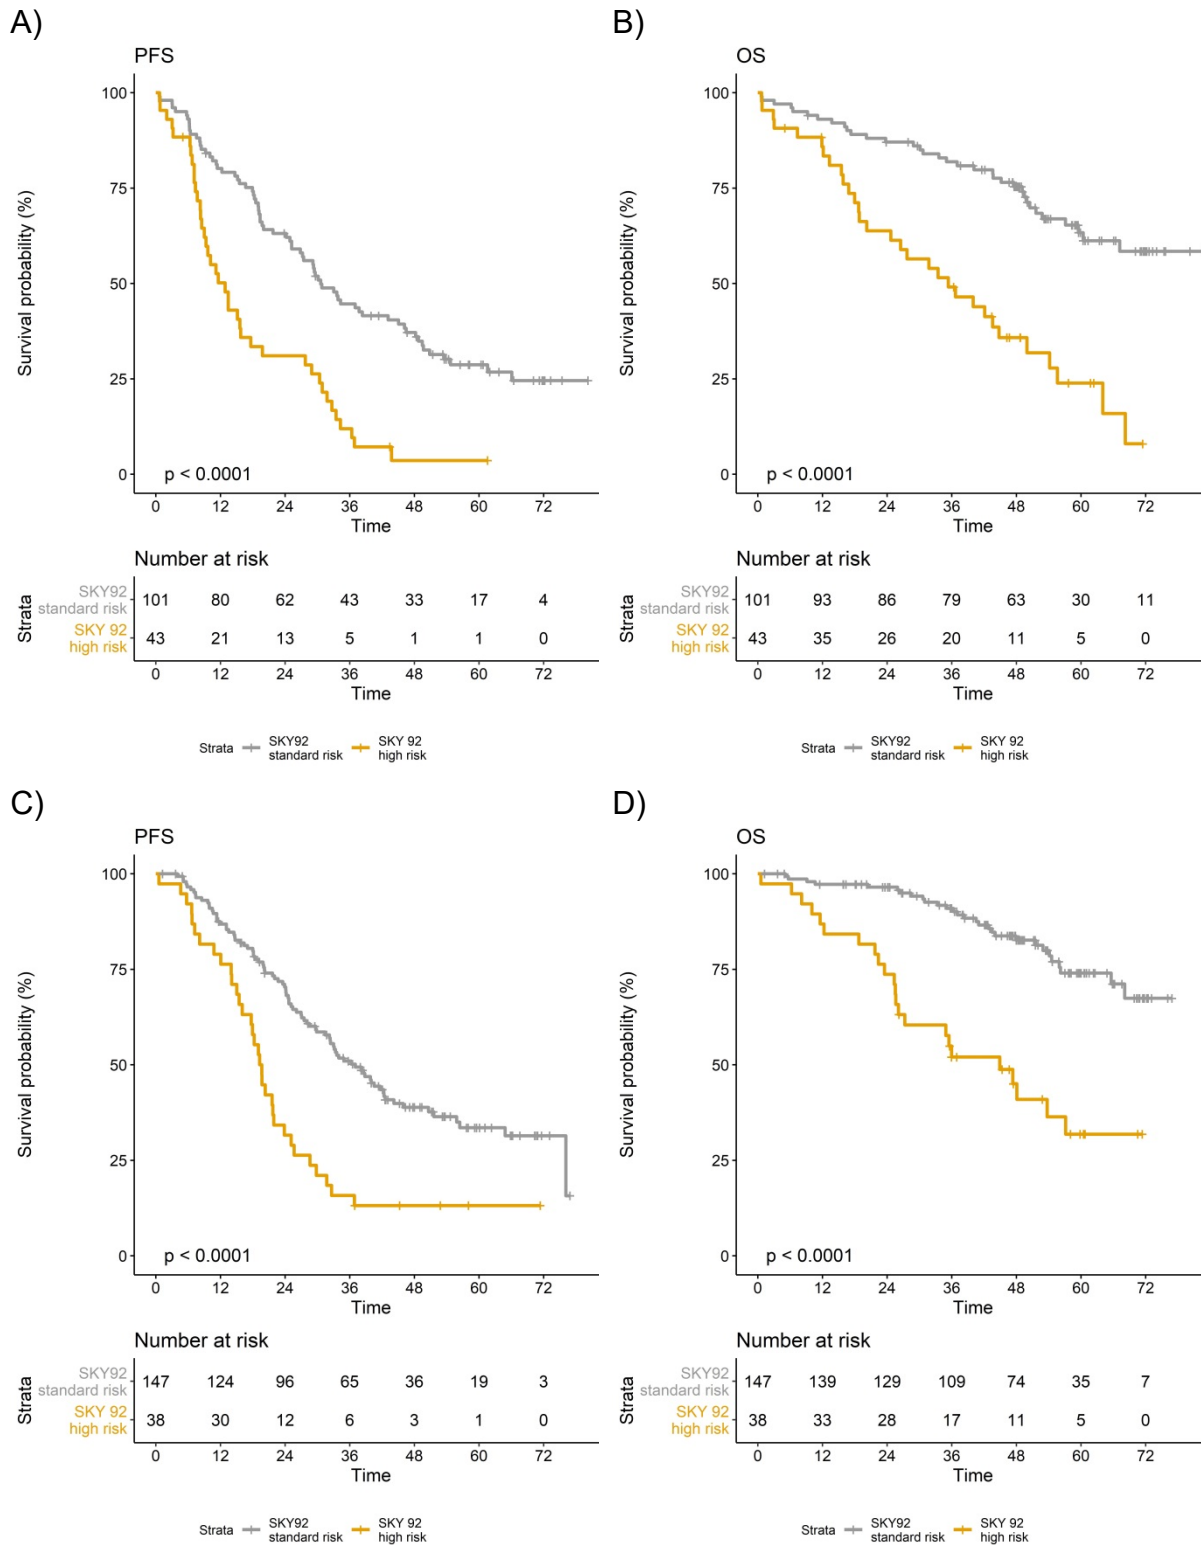

## Supplementary Figure 3

Kaplan-Meier plots for PFS and OS for double-hit (A,B,E,F,I,J) or SKY92 (C,D,G,H,K,L) high-risk absent vs landmarked from induction randomization (A,B,C,D), post high dose melphalan and autologous stem cell transplant (E,F,G,H) and randomization to lenalidomide maintenance (subset to only patients randomized to lenalidomide monotherapy)(I,J,K,L).

### Double-hit vs other

### SKY92 High-Risk vs other

Landmarked post induction randomisation

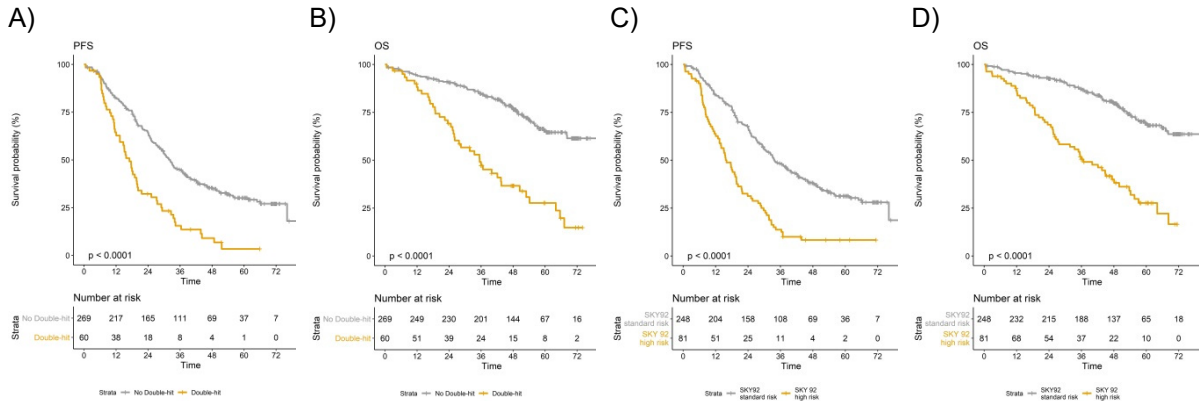

Landmarked post transplantation

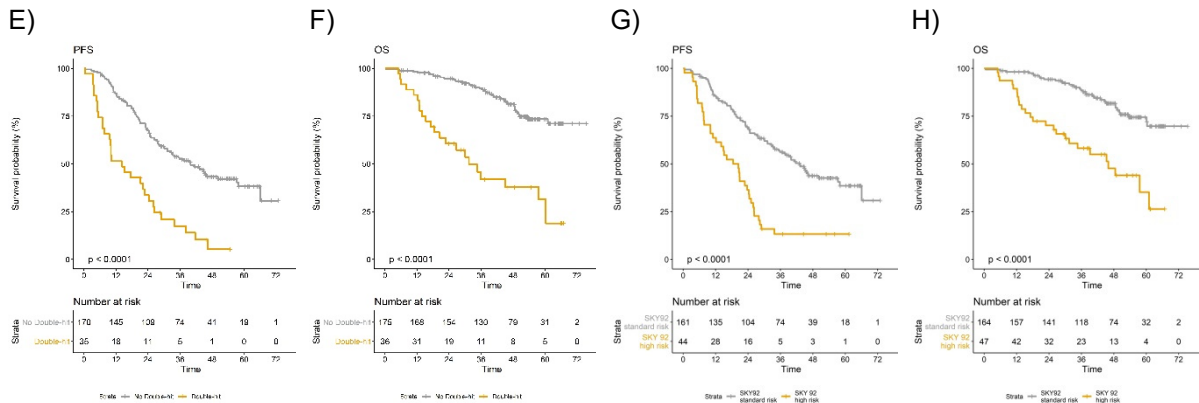

Landmarked from lenalidomide randomization (subset to patients who were randomized to receive lenalidomide)

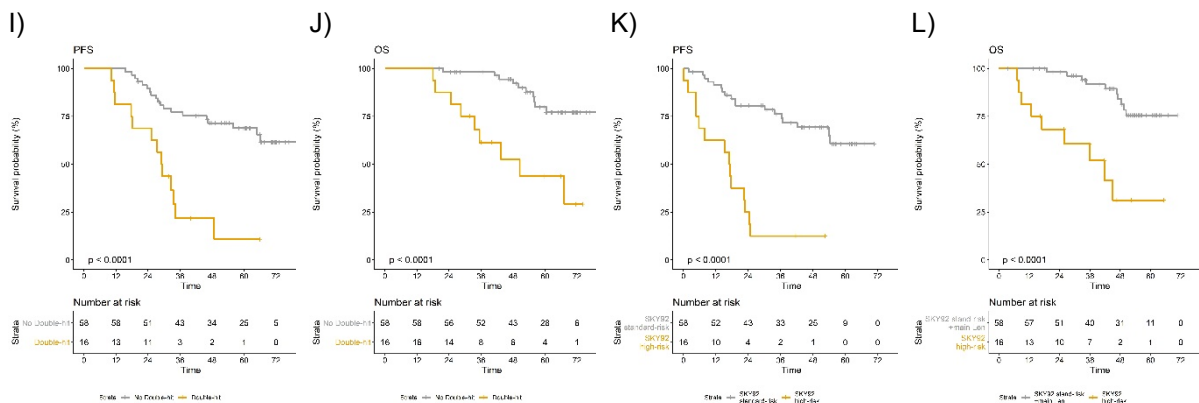

## Supplementary Figure 4

Kaplan-Meier plots of subset of 161 patients with no chromosomal high-risk markers in context of presence or absence of SKY92 high-risk status A) PFS B) OS.

A)

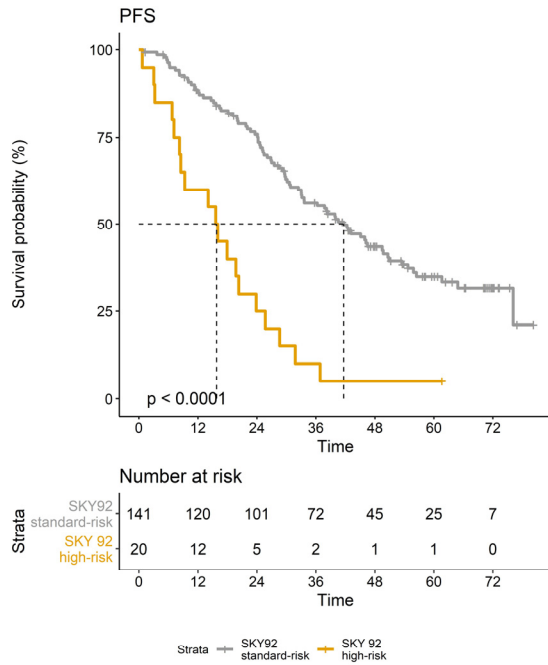

B)

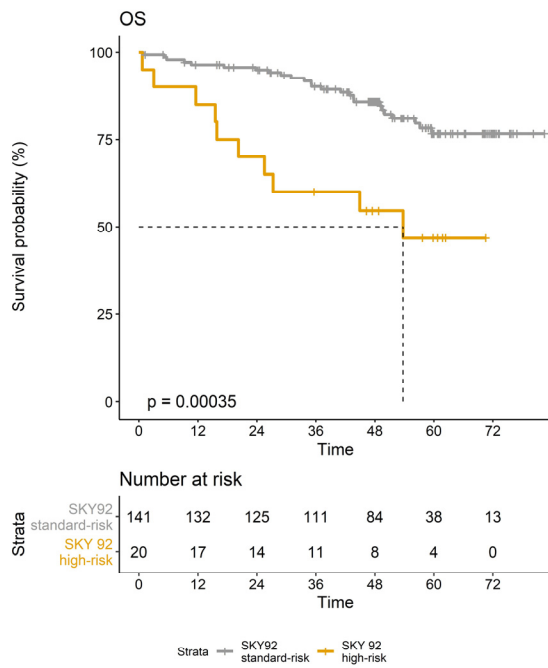

## Supplementary Figure 5

Kaplan-Meier plots of molecular risk groups defined by absence of any high-risk marker, presence of a single genetic marker, presence of either double-hit or SKY92 high-risk or combined double-hit and SKY92 high-risk for A) PFS B) OS landmarked from HDME1+ASCT consolidation.

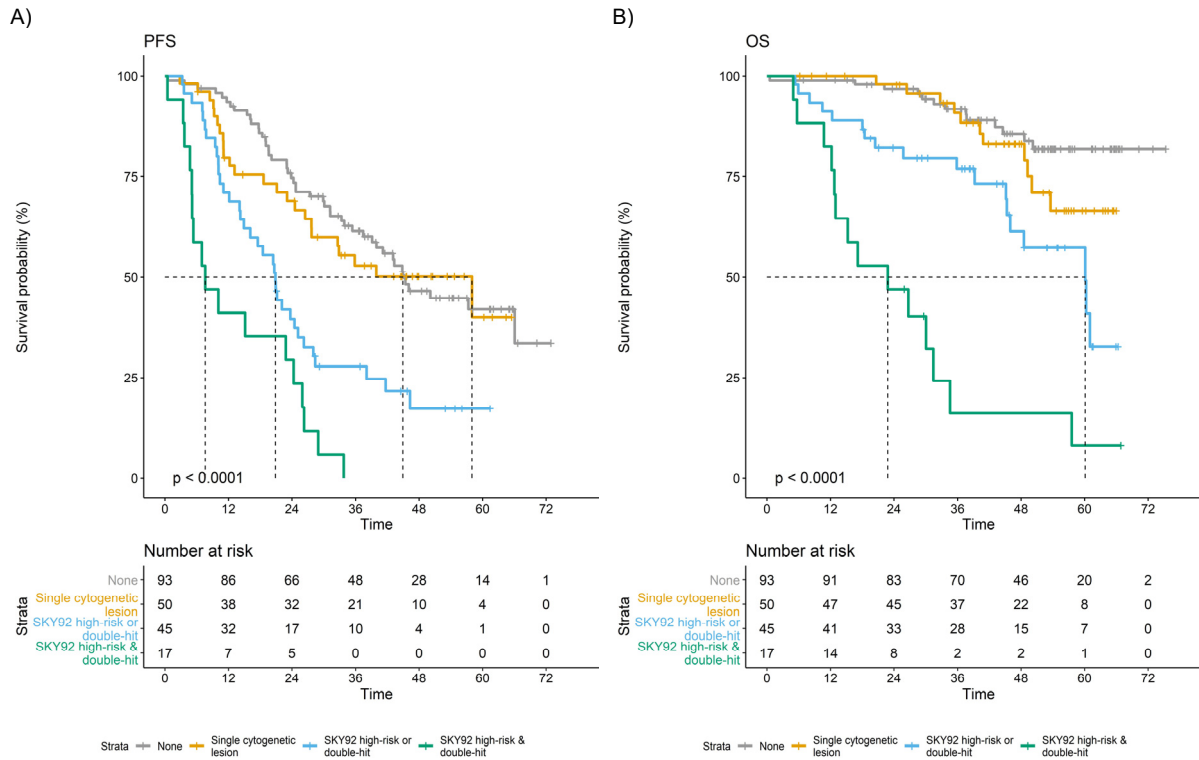

## Supplementary Figure 6

Kaplan-Meier plots of molecular risk groups defined by absence of any high-risk marker, presence of a single genetic marker, presence of either double-hit or SKY92 high-risk or combined double-hit and SKY92 high-risk for A) PFS B) OS from maintenance randomization. Kaplan-Meier plots for molecular risk groups of patients that underwent maintenance lenalidomide or observation only. Landmarked analysis from Lenalidomide maintenance randomization, showing lenalidomide vs. observation for sub-groups with C) no genetic or gene expression high-risk marker D) single genetic high-risk marker E) double-hit or SKY92 high-risk F) double-hit and SKY92 high-risk.

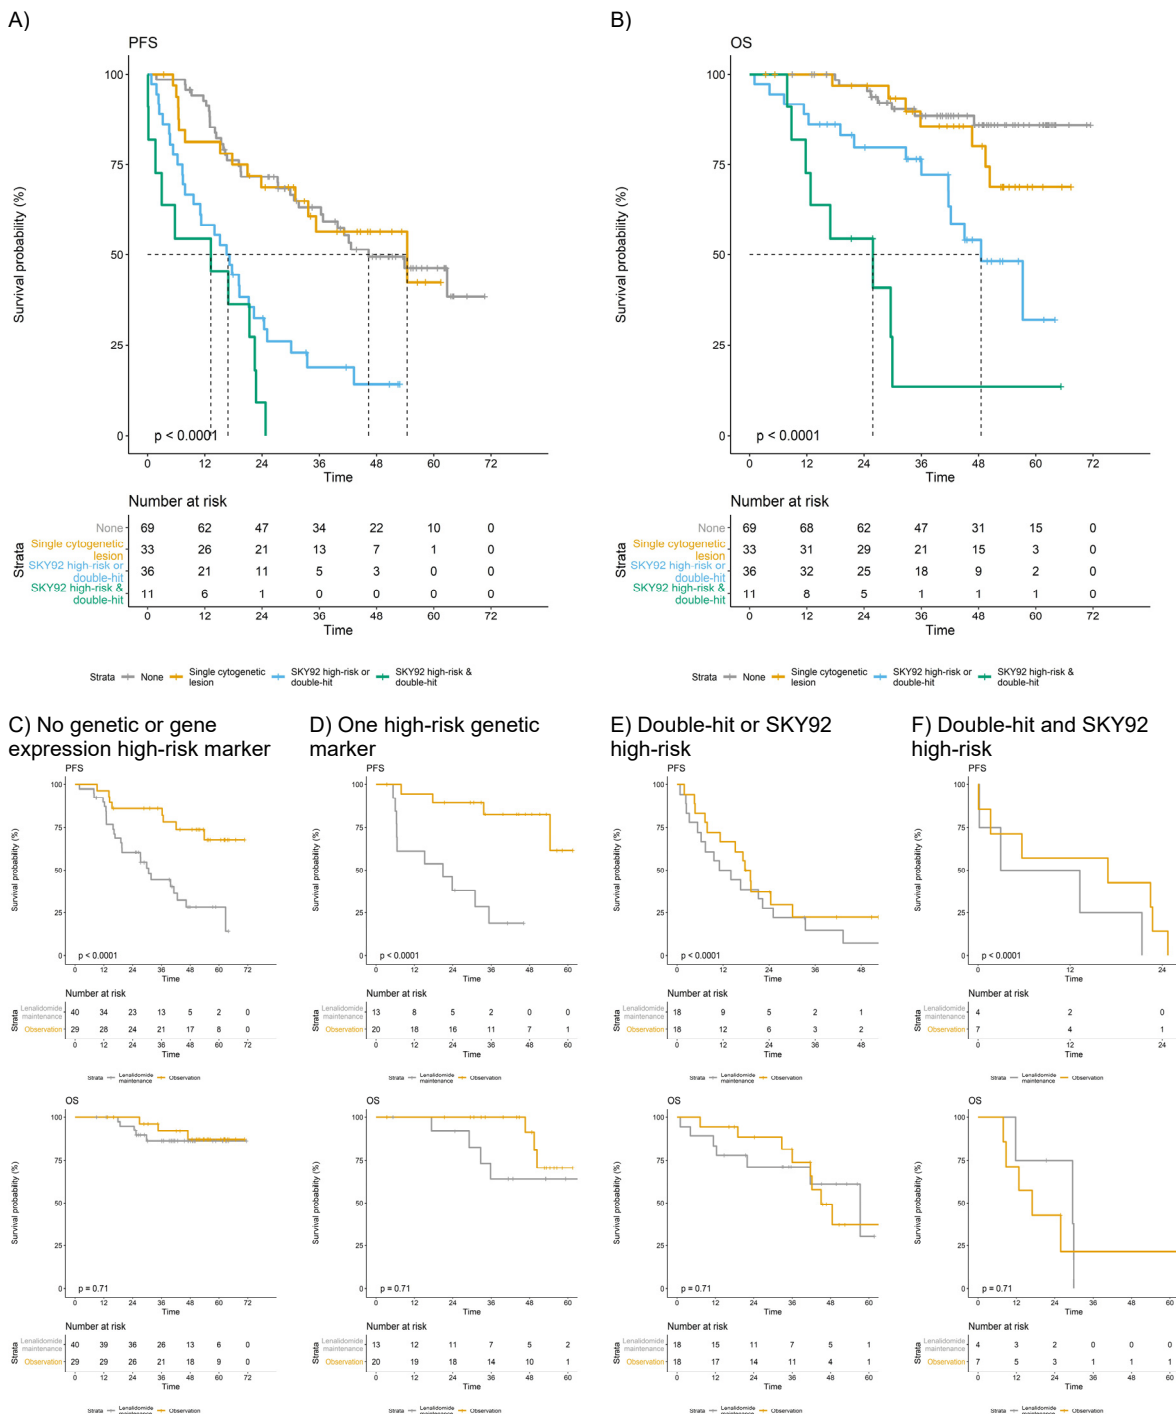

## Supplementary Figure 7

Kaplan-Meier plots of intensive treatment arm (ITT; high dose melphalan+ASCT) patients with combined double-hit and SKY92/EMC92 ultra high-risk vs. those without from two phase 3 trials, NCRI Myeloma XI (A, B) and MRC Myeloma IX (C, D) from time of induction randomization.

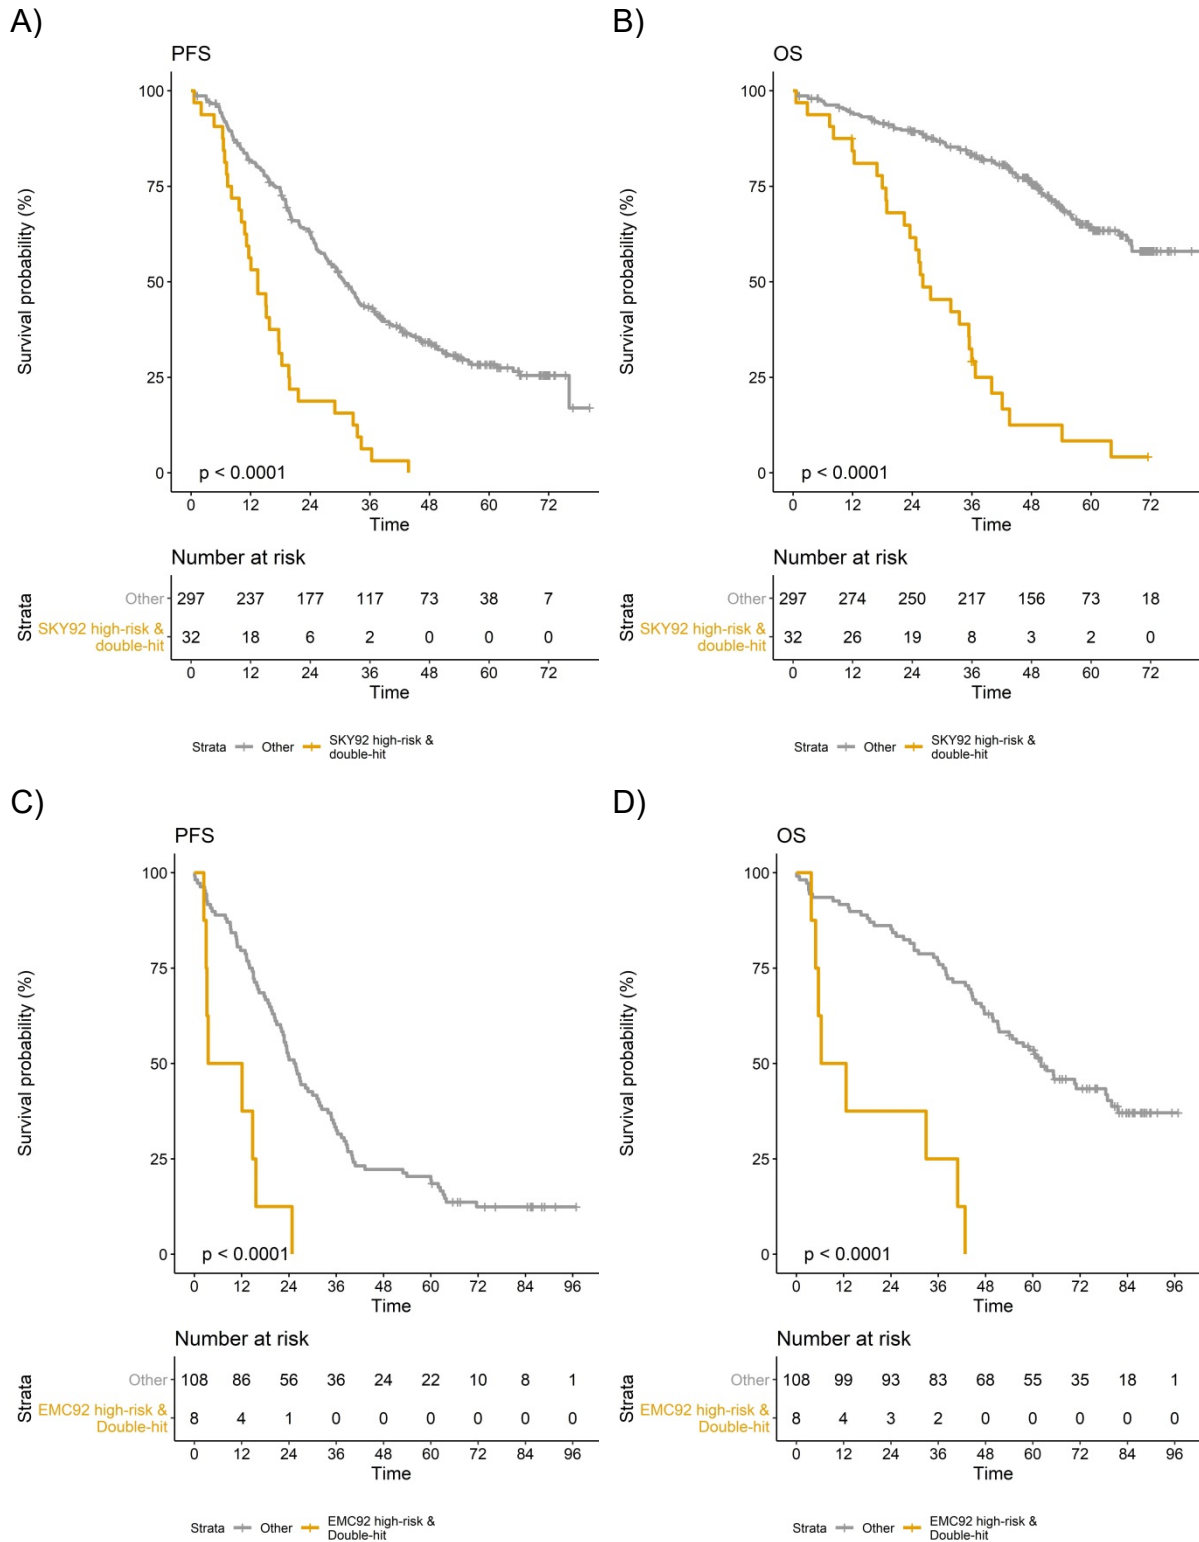



## Supplementary Figure 8

Kaplan-Meier plots of NCRI Myeloma XI patients as per diagnostic ISS risk scores from induction randomisation: A) PFS, B) OS.

A)

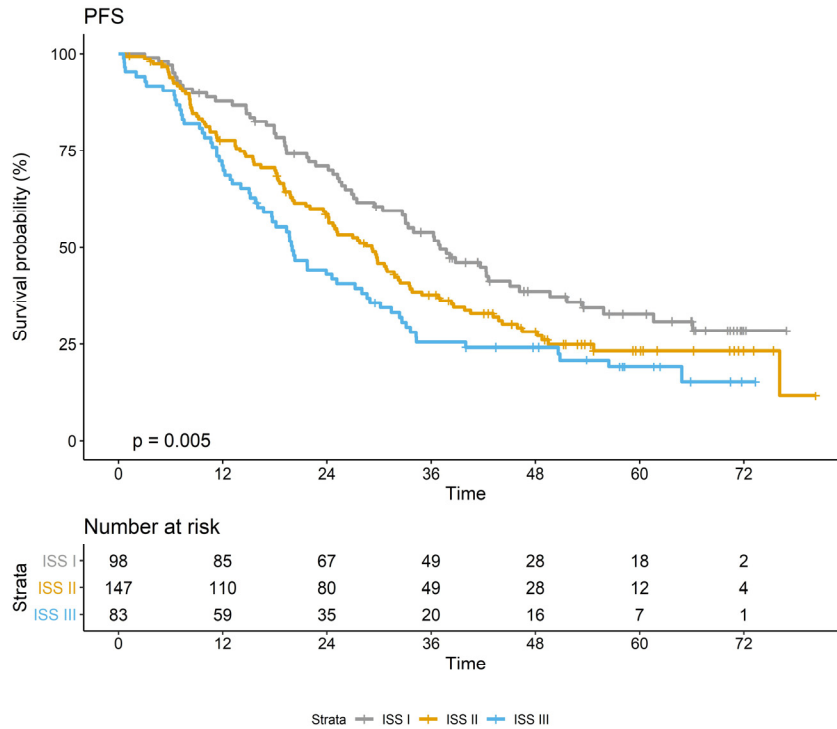

B)

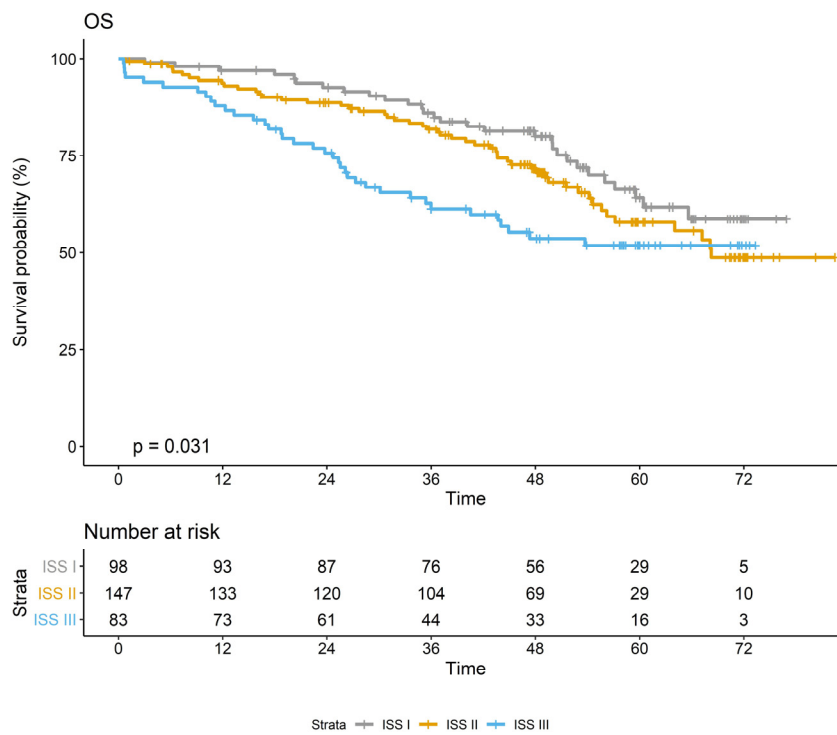

## Supplementary Figure 9

Proportion of patients with ISS status for groups with A) no, single or double-hit genetics and patients with B) absence or presence of SKY92 high risk. LDH values at presentation for patients with C) no, single or double-hit genetics and patients with D) absence or presence of SKY92 high risk.

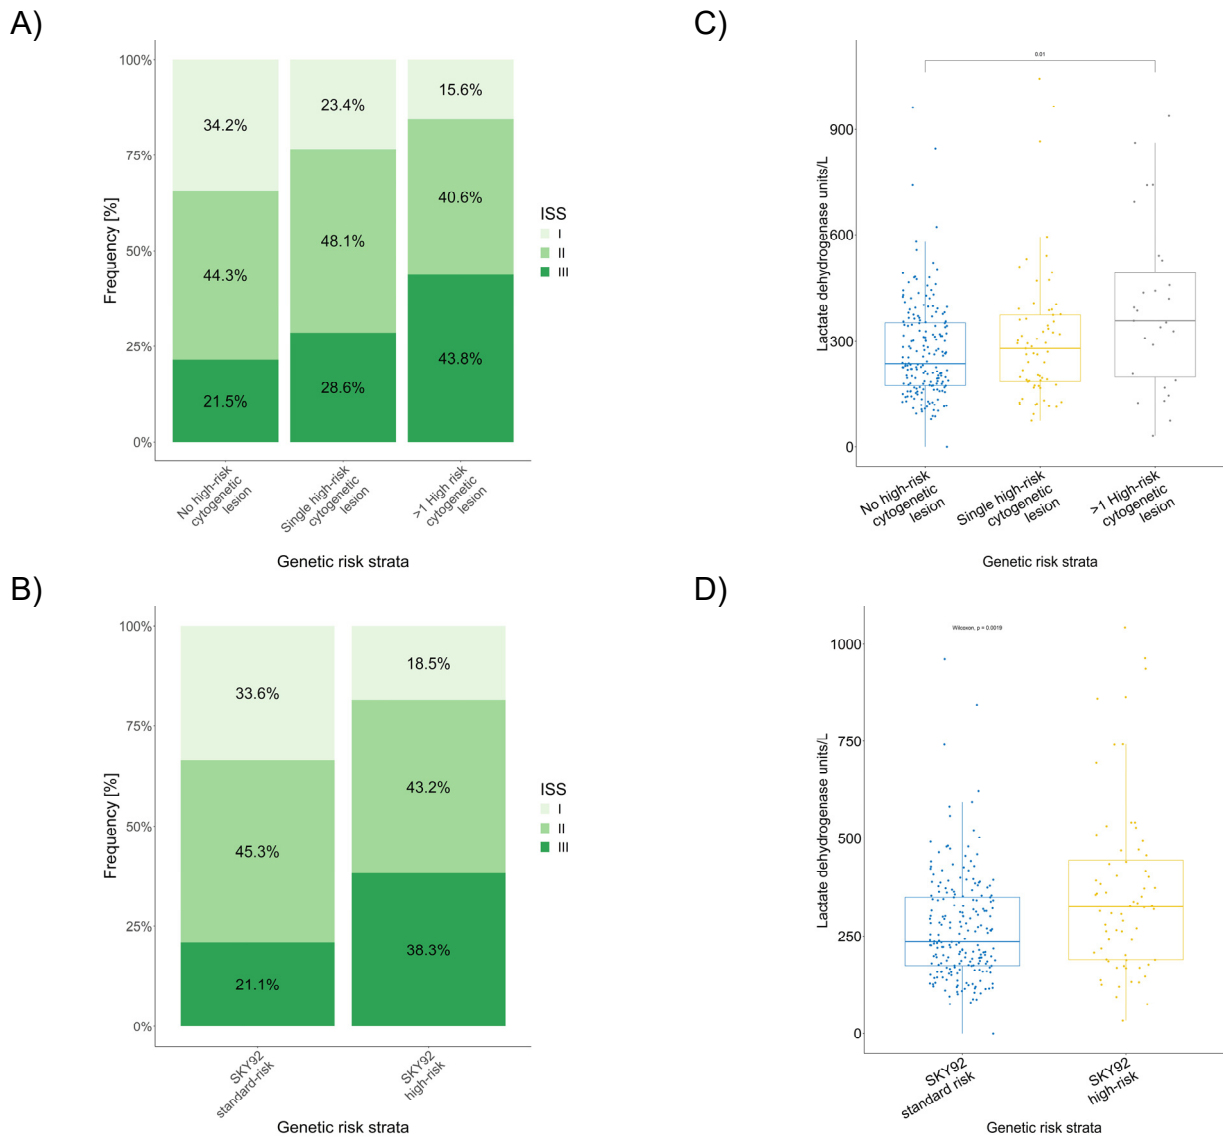

## Supplementary Figure 10

A) ISS B) LDH and C) platelet count at diagnosis as per defined risk strata. Venn diagram showing number and overlap of patients with ISS 3, SKY92 high-risk and any chromosomal risk marker. D) Venn diagram of absolute number of and overlap between patients with ISS 3, SKY92 high-risk and/or chromosomal risk markers.

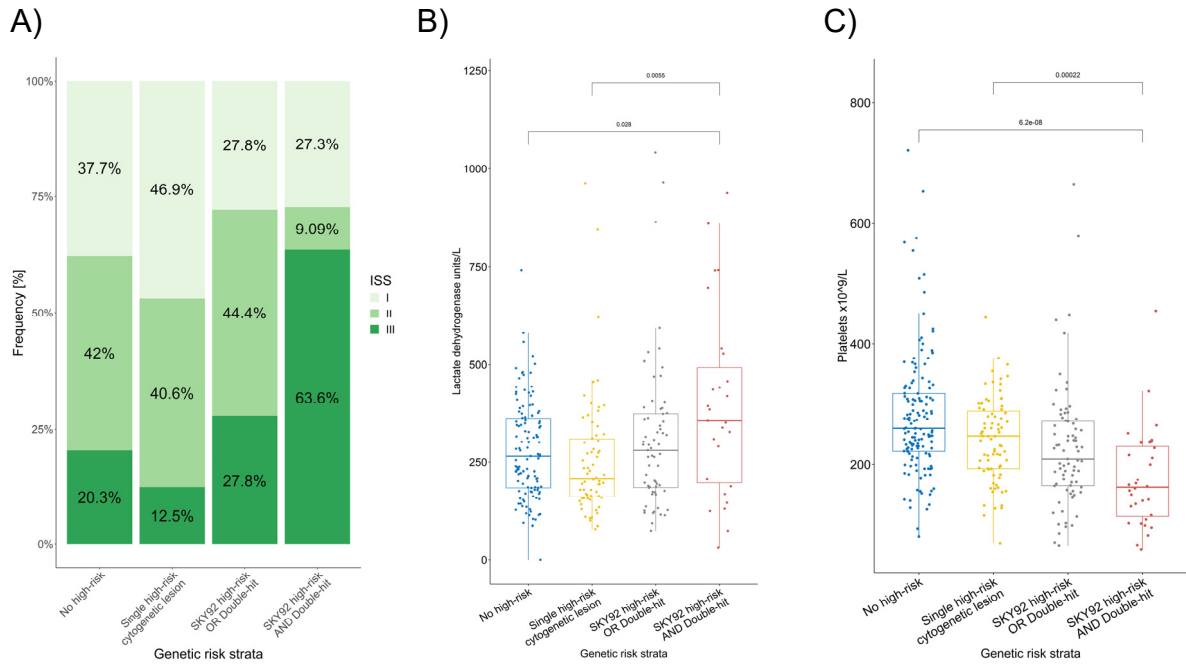

D)

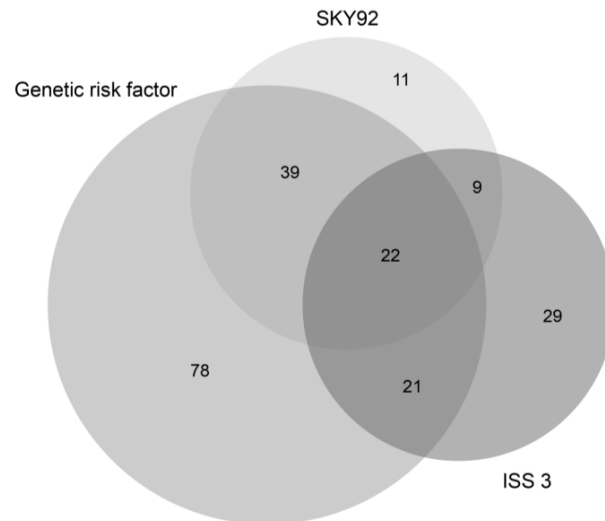

## Supplementary Figure 11

A) Correlation plot of quantitative scores for published risk and/or biological GEP signatures. Color coding correlation coefficient. Abbreviations: HMCL7- 7 gene prognostic signature from MM cell line study, CIGNECS = chromosome instability signature, CNTI = centrosome index, HZDCD = homozygous cell death signature (MIX signature), IFM-15 – prognostic signature by IFM Myeloma 99 clinical trial, PI = Proliferation signature, UAMS70 and UAMS80 = 70 and 80 gene signature by UAMS, EMC92 = prognostic signature HOVON-65/GMMG-HD4. B) Dot plot of quantitative scores for EMC92 and UAMS GEP70 signatures.

A)

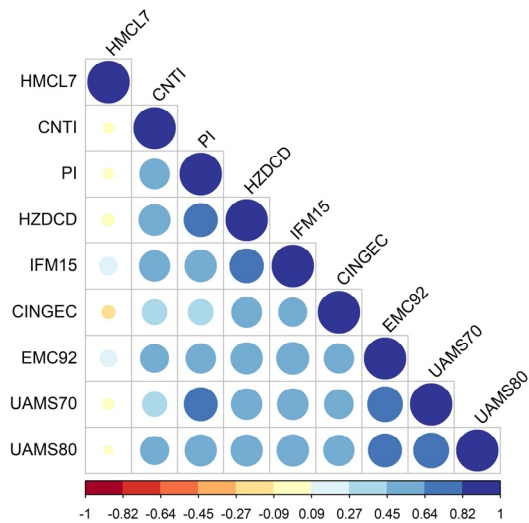

B)

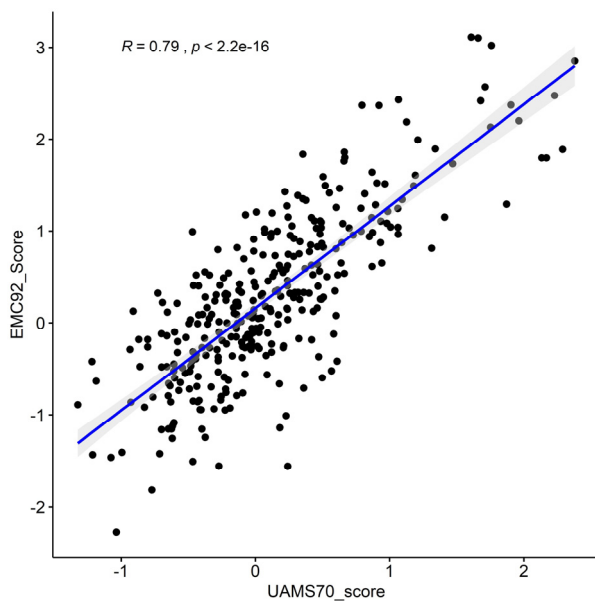

## Supplementary Figure 12

EMC92 quantitative score plotted for groups with A) normal, gained or amplified chromosome 1q B) normal, heterozygous or homozygous deletion 17p.

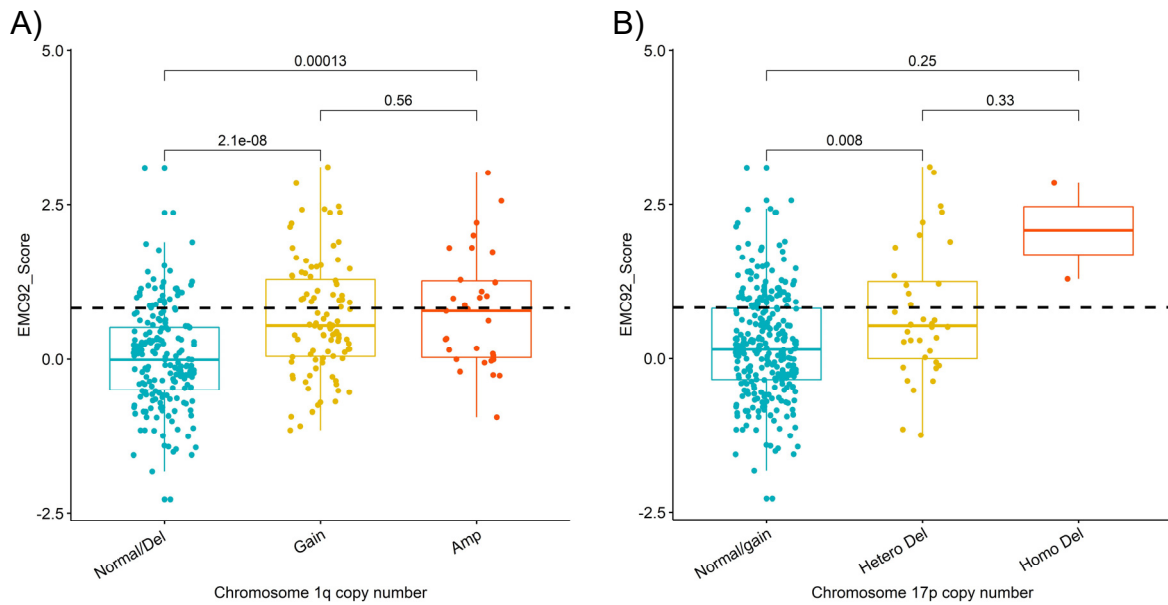

### Supplementary Figure 13

Bar plot of quantitative EMC92 continuous scores in quantitative order. Yellow colored bars were positive for the presence of a high risk translocation (t(4;14), t(14;16) or t(14;20) and blue colored bars did not have these. All patients above 0.827 were considered high risk as per EMC92 criteria.

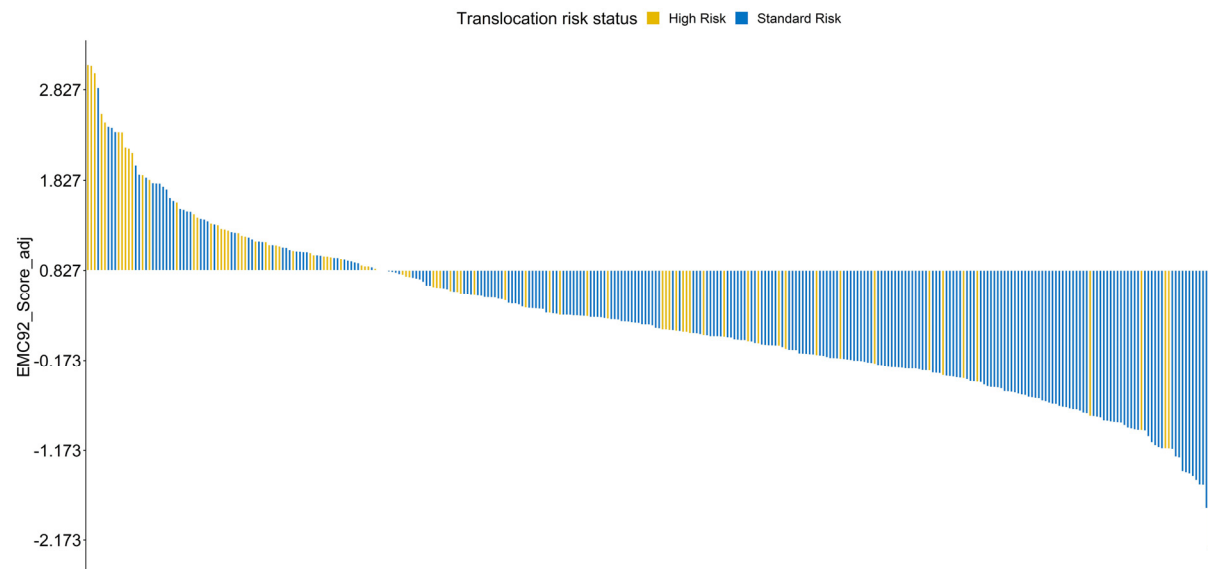

Supplement: 41375_2020_750_MOESM1_ESM.pdf [file 41375_2020_750_MOESM1_ESM.pdf]
